1 **High throughput single cell genome sequencing gives insights in the generation and evolution**  
2 **of mosaic aneuploidy in *Leishmania donovani***

3

4 Gabriel H. Negreira<sup>1</sup>, Pieter Monsieurs<sup>1</sup>, Hideo Imamura<sup>1</sup>, Ilse Maes<sup>1</sup>, Nada Kuk<sup>2</sup>, Akila Yagoubat<sup>2</sup>, Frederik  
5 Van den Broeck<sup>1,3</sup>, Yvon Sterkers<sup>2</sup>, Jean-Claude Dujardin<sup>1,4</sup>, Malgorzata A. Domagalska<sup>1</sup>

6

7 Authors Affiliation:

8 <sup>1</sup> Molecular Parasitology Unit, Institute of Tropical Medicine, Antwerp, Belgium

9 <sup>2</sup> MiVEGEC, University of Montpellier, CNRS, IRD, Montpellier, France

10 <sup>3</sup> Department of Microbiology, Immunology and Transplantation, Rega Institute for Medical  
11 Research, Katholieke Universiteit Leuven, 3000 Leuven, Belgium

12 <sup>4</sup> Department of Biomedical Sciences, University of Antwerp, Belgium.

13

14 Keywords: *Leishmania*, single cell genome sequencing, mosaic aneuploidy

15

16

17 **Abstract**

18 *Leishmania*, a unicellular eukaryotic parasite, is a unique model for aneuploidy and cellular  
19 heterogeneity, along with their potential role in adaptation to environmental stresses. Somy  
20 variation within clonal populations was previously explored in a small subset of chromosomes  
21 using fluorescence hybridization methods. This phenomenon, termed mosaic aneuploidy (MA),  
22 might have important evolutionary and functional implications but remains under-explored due  
23 to technological limitations. Here, we applied and validated a high throughput single-cell  
24 genome sequencing method to study for the first time the extent and dynamics of whole  
25 karyotype heterogeneity in two *Leishmania* clonal populations representing different stages of  
26 MA evolution in vitro. We found that drastic changes in karyotypes quickly emerge in a  
27 population stemming from an almost euploid founder cell. This possibly involves  
28 polyploidization/hybridization at an early stage of population expansion, followed by assorted  
29 ploidy reduction. During further stages of expansion, MA increases by moderate and gradual  
30 karyotypic alterations. MA usually affected a defined subset of chromosomes, of which some  
31 display an enrichment in snoRNA genes which could represent an adaptative benefit to the  
32 amplification of these chromosomes. Our data provide the first complete characterization of  
33 MA in *Leishmania* and pave the way for further functional studies.

34

35

## 36 Introduction

37 Aneuploidy, i.e., an imbalance in the copy number of chromosomes in a cell, occurs in a  
38 wide range of organisms, including both non- and pathogenic unicellular eukaryotes, such as  
39 *Saccharomyces cerevisiae*, *Candida albicans*, *Cryptococcus neoformans* and *Leishmania* spp, but  
40 also in different types of human cancer cells (Downing et al., 2011; Holland and Cleveland, 2009;  
41 Mulla et al., 2014; Rogers et al., 2011; Selmecki et al., 2006; Sterkers et al., 2011). Although  
42 generally considered to be detrimental in multicellular organisms, aneuploidy can also be  
43 beneficial, in particular for unicellular organisms facing drastic changes in the environment  
44 (Gilchrist and Stelkens, 2019; Siegel and Amon, 2012). In pathogens, aneuploidy facilitates rapid  
45 adaptation to environmental stresses through changes in gene dosage and may have an impact  
46 on both virulence and the development of drug resistance (Beach et al., 2017; Gerstein et al.,  
47 2015; Gilchrist and Stelkens, 2019; Hirakawa et al., 2017; Hu et al., 2011; Ni et al., 2013; Reis-  
48 Cunha et al., 2017).

49 *Leishmania*, a genus of digenetic protozoan parasites, is emerging as a unique model for  
50 aneuploidy (Mannaert et al., 2012). These parasites are responsible for a spectrum of clinical  
51 forms of leishmaniasis worldwide and cause 300,000 new cases per year (WHO, 2020). They  
52 can be found in two forms during their life cycle: as an extracellular promastigote in the midgut  
53 of phlebotomine sand fly vectors and exclusively as intracellular amastigote inside mammalian  
54 host phagocytic cells. Thus, *Leishmania* parasites are adapted to these two drastically different  
55 environments. From a molecular point of view, *Leishmania*, as other trypanosomatids, is unique  
56 in the Eukaryota domain (Adl et al., 2012). This includes the genomic organization in long  
57 polycistronic units, the near absence of transcription initiation regulation by RNA polymerase II  
58 promoters with gene expression regulation almost exclusively through post-  
59 transcriptional mechanisms, and its remarkable genomic plasticity (Clayton, 2019; Reis-Cunha  
60 et al., 2017). The *Leishmania* genome is generally considered to be diploid, although all  
61 *Leishmania* genomes analyzed hitherto display aneuploidy affecting at least one chromosome,  
62 i.e., a polysomy in Chr31. Moreover, high levels of ‘average’ aneuploidy (average will be used  
63 throughout this paper for features derived from bulk analyses of population of cells) affecting  
64 other chromosomes are commonly found by bulk genome sequencing (BGS) of in vitro cultured  
65 promastigotes (Downing et al., 2011; Rogers et al., 2011). This average aneuploidy is highly  
66 dynamic and changes when cultivated parasite populations are exposed to different  
67 environments such as the vector, the vertebrate host or in response to drug pressure (Dumetz

68 et al., 2017; Shaw et al., 2016; Ubeda et al., 2008). In fact, changes in average aneuploidy  
69 pattern and not variation in nucleotide sequence are the first genomic modifications  
70 observed at populational level during the course of experimental selection of drug resistance  
71 (Dumetz et al., 2018; Shaw et al., 2016). Given that these alterations in average somies are  
72 reflected in the average amount of corresponding transcripts, and to a certain degree, of  
73 proteins, it has been proposed that aneuploidy allows *Leishmania* to adapt by means of rapid  
74 changes in gene dosage (Barja et al., 2017; Cuypers, 2018; Dumetz et al., 2017).

75 *Leishmania* parasites exhibit a remarkable cellular heterogeneity in the form of mosaic  
76 aneuploidy, where individual daughter cells originating from a single parent (i.e., a clonal  
77 population) may display distinct somies (Lachaud et al., 2014; Sterkers et al., 2011). The full  
78 extent of mosaic aneuploidy in *Leishmania* and its dynamics during adaptation to new  
79 environment remains largely unexplored due to technological limitations. The only estimation  
80 of karyotype heterogeneity was based on the FISH studies of a small set of chromosomes, where  
81 it was speculated that thousands of karyotypes may co-exist in a clonal population of  
82 *Leishmania* promastigotes (Sterkers et al., 2011). Mosaicism was proposed to provide a source  
83 of functional diversity within a population of *Leishmania* cells, through gene dosage, but also  
84 through changes in heterozygosity (Barja et al., 2017; Sterkers et al., 2012). This diversity of  
85 karyotypes would provide an adaptive potential to unpredictable environmental changes  
86 during the parasite's life cycle or drug pressure caused by patient treatment (Barja et al., 2017;  
87 Sterkers et al., 2012).

88 Here, we applied and validated for the first time a high-throughput, droplet-based  
89 platform for single cell genome sequencing (SCGS) of thousands of individual *Leishmania*  
90 promastigotes. This allowed the assessment of the degree and the dynamics of the evolution  
91 of mosaic aneuploidy in two clonal populations in vitro representing different stages of  
92 adaptation to culture conditions. Based on our study, we propose that the early stages of  
93 adaptation are characterized by rapid and drastic changes in karyotypes, allowing initial  
94 establishment of highly aneuploid cells in a population of almost euploid parasites. In the next  
95 steps, the existing highly aneuploid karyotypes further evolve through gradual and moderate  
96 changes in somies resulting in a population of aneuploid cells displaying closely related  
97 karyotypes. Our findings strongly support the hypothesis that mosaic aneuploidy is a  
98 constitutive feature of *Leishmania* parasites, representing a unique source of functional  
99 diversity.

## 100 **Materials and Methods**

### 101 **Parasites**

102 In the present paper we use the terms population, strain and clone as defined in the  
103 supplementary text. *L. donovani* promastigotes were maintained at 26 °C in HOMEM medium  
104 (Gibco, ThermoFisher) supplemented with 20% Fetal Bovine Serum, with regular passages done  
105 every 7 days at 1/25 dilutions. The clones BPK282 cl4 and BPK081 cl8 were derived from two  
106 strains adapted to culture: MHOM/NP/02/BPK282/0 and MHOM/NP/02/BPK081/0 (Imamura  
107 et al., 2016). These clones were submitted to SCGS at 21 (~126 generations) and 7 passages  
108 (~56 generations) after cloning respectively (supp. fig.1). Four strains were mixed to create an  
109 artificial 'super-mosaic' population of cells (further called super-mosaic): BPK475  
110 (MHOM/NP/09/BPK475/9), BPK498 (MHOM/NP/09/BPK498/0), BPK506  
111 (MHOM/NP/09/BPK506/0) and HU3 (MHOM/ET/67/HU3). They were kept in vitro for several  
112 passages after isolation from patients (respectively 41, 60, 47 and more than 24) and mixed at  
113 equivalent ratio just before preparation for SCGS.

### 114 **Single-cell suspensions preparation and sequencing**

115 Promastigotes at early stationary phase (day 5) were harvested by centrifugation at 1000 rcf  
116 for 5 min, washed twice with PBS 1X (calcium and magnesium-free) + 0.04% BSA, diluted to  
117  $5 \times 10^6$  parasites/mL and passed through a 5  $\mu$ m strainer to remove clumps of cells. After  
118 straining, volume was adjusted with PBS 1X + 0.04% BSA to achieve a final concentration of  
119  $3 \times 10^6$  parasites/mL. The absence of remaining cell doublets or clumps in the cell suspension  
120 was confirmed by microscopy. Cell viability was estimated by flow cytometry (BD FACSverse™)  
121 using the NucRed™ Dead 647 probe (Life technologies™) following the recommendations of  
122 the manufacturer and in all samples was estimated as higher than 95%. SCGS was performed  
123 using the Chromium™ single-cell CNV solution (scCNV) from 10X Genomics™. To target an  
124 average of 2000 sequenced cells per sample, 4.2  $\mu$ L of the cell suspensions were used as input,  
125 and cell encapsulation, barcoding, whole genome amplification and library preparation were  
126 performed following manufacturer's recommendations. Sequencing of the libraries was done  
127 with an Illumina NovaSeq™ SP platform with 2x150 bp reads.

### 128 **Single Cell Somy estimation**

129 Details about the bioinformatics analysis for somy values determination are provided in the  
130 supplementary material. In summary, sequence reads were associated to each sequenced cell

131 based on their barcodes and mapped to a customized version of the reference *L. donovani*  
132 genome LdBPKv2 (Dumetz et al., 2017) using the Cell Ranger DNA<sup>TM</sup> software (10X Genomics).  
133 The matrix generated by the software with the number of mapped reads per 20kb bins was  
134 used as input to a custom script written in R (R Core Team, 2013). In this script, bins with outlier  
135 values were excluded, and the mean normalized read depth (MNRD) of each chromosome was  
136 calculated for each cell. Cells displaying a high intra-chromosomal variation were removed from  
137 downstream analysis. In order to establish the baseline ploidy of each cell, the MNRD values  
138 were multiplied by the scale factor ( $Sc$ ), defined for each cell as the lowest number between 1.8  
139 and 5 that leads to the shortest distance to integers when all MNRD values are multiplied by it.  
140 The MNRD values multiplied by  $Sc$  are referred here as 'raw somies'. To convert the raw somies  
141 (continuous) into integer copy numbers (discrete), a univariate gaussian mixture-model was  
142 built for each chromosome by an expectation-maximization algorithm based on the distribution  
143 of the raw somy values between all cells of the same sample using the Mixtools package  
144 (Benaglia et al., 2009). For each possible integer somy, a gaussian mixture-model was generated  
145 and each raw somy value was assigned to the rounded mean of the gaussian to which it has  
146 higher probability of belonging to.

#### 147 **Karyotype identification and network analysis**

148 A karyotype was defined as the combination of integer somies of all chromosomes in a cell.  
149 Karyotypes were numerically named according to their frequency in the sequenced population.  
150 To generate the network representing the dissimilarities between the karyotypes, a pairwise  
151 distance matrix was built based on the number of different chromosomes between all  
152 karyotypes in a sample, and used to create a randomized minimum spanning tree with 100  
153 randomizations, using the Pegas R package (Paradis, 2018, 2010). The network visualization was  
154 made with the visNetwork package (Almende B.V. et al., 2019).

#### 155 **Doublet detection**

156 The relative fraction of doublets within the super mosaic population has been estimated  
157 based on the high number of SNPs found in the HU3 strain when compared to the *L. donovani*  
158 reference genome. The three other strains in the super mosaic only show a limited number of  
159 SNPs in contrast. Potential doublets were identified by looking for mixture of both SNP profiles  
160 (HU3 and non-HU3) in assumed single cell data. This approach was applied using an in-house

161 developed algorithm and the Demuxlet algorithm (Kang et al., 2018), both approaches leading  
162 to identical results (see Supplementary Text).

### 163 **DNA probes and fluorescence in situ hybridization**

164 DNA probes were either cosmid (L549 specific of chromosome 1) or BAC (LB00822 and  
165 LB00273 for chromosomes 5 and 22 respectively) clones that were kindly provided by Peter  
166 Myler (Seattle Biomedical Research Institute) and Christiane Hertz-Fowler (Sanger Centre). DNA  
167 was prepared using Qiagen Large-Construct Kit and labelled with tetramethyl-rhodamine-5-  
168 dUTP (Roche Applied Sciences) by using the Nick Translation Mix (Roche Applied Sciences)  
169 according to manufacturer instructions. *Leishmania* cells were fixed in 4% paraformaldehyde  
170 then air-dried on microscope immunofluorescence slides, dehydrated in serial ethanol baths  
171 (50–100%) and incubated in NP40 0.1 % for 5 min at RT. Around 100 ng of labelled DNA probe  
172 was diluted in hybridization solution containing 50% formamide, 10% dextran sulfate, 2× SSPE,  
173 250 µg.mL<sup>-1</sup> salmon sperm DNA. Slides were hybridized with a heat-denatured DNA probe  
174 under a sealed rubber frame at 94 °C for 2 min and then overnight at 37 °C and sequentially  
175 washed in 50% formamide/2× SSC at 37 °C for 30 min, 2× SSC at 50 °C for 10 min, 2× SSC at 60  
176 °C for 10 min, 4× SSC at room temperature. Finally, slides were mounted in Vectashield (Vector  
177 Laboratories) with DAPI. Fluorescence was visualized using appropriate filters on a Zeiss  
178 Axioplan 2 microscope with a 100× objective. Digital images were captured using a  
179 Photometrics CoolSnap CCD camera (Roper Scientific) and processed with MetaView (Universal  
180 Imaging). Z-Stack image acquisitions (15 planes of 0.25 µm) were systematically performed for  
181 each cell analyzed using a Piezo controller, allowing to view the nucleus in all planes and to  
182 count the total number of labelled chromosomes. Around 200 cells [187-228] were analyzed  
183 per chromosome.

### 184 **Bulk Genome Sequencing (BGS)**

185 Genomic DNA from the BPK282 cl4 and BPK081 cl8 clones was extracted in bulk using the  
186 QIAmp™ DNA Mini kit (Qiagen) following manufacturer's recommendations. PCR-free whole  
187 genome sequencing was performed on the Illumina NovaSeq platform using 2x150 bp paired  
188 reads. Reads are mapped to the reference genome *L. donovani* LdBPKv2 (available at  
189 <ftp://ftp.sanger.ac.uk/pub/project/pathogens/Leishmania/donovani/LdBPKPAC2016beta/>)  
190 using BWA (version 0.7.17) with seed length set to 100 (Li and Durbin, 2009). Only properly  
191 paired reads with a mapping quality higher than 30 were selected using SAMtools (Li et al.,

192 2009). Duplicates reads were removed using the RemoveDuplicates command in the Picard  
193 software (<http://broadinstitute.github.io/picard/>). The average somy values were calculated as  
194 described previously (Downing et al., 2011), by dividing the median sequencing depth of a  
195 chromosome by the overall median sequencing depth over all chromosomes, and multiplying  
196 this ratio by 2. These values were used to define an average karyotype for the sequenced  
197 population of cells (Kp).

#### 198 **Gene Ontology analysis and in silico screening for small RNA**

199 Gene Ontology (GO) classes were obtained from TriTrypDB release 49 (Aslett et al., 2009).  
200 As the genome sequence stored on TriTrypDB does not correspond with the reference genome  
201 used in this work, the GO annotation was obtained by mapping back all genes to our reference  
202 genome using BlastP (Altschul et al., 1997). Clustering of the different chromosomes based on  
203 their assigned GO classes was performed using the prcomp command in R.

204 The Rfam (Kalvari et al., 2021) database version 14.4 was used to screen the *L. donovani*  
205 BPK282 reference genome using the cmscan algorithm as implemented in Infernal (Nawrocki  
206 and Eddy, 2013) using default parameters and setting the search space parameter to 64.



## 207 Results

### 208 High throughput single-cell genome sequencing as a reliable tool to explore karyotype 209 heterogeneity in *Leishmania* populations

210 We applied high throughput single-cell genome sequencing (SCGS) to address mosaic  
211 aneuploidy in promastigotes of two *Leishmania* clones differing substantially in average  
212 aneuploidy (referred here as the ‘average populational karyotype’, or Kp) as revealed by Bulk  
213 Genome Sequencing (BGS): (i) BPK282 cl4, an aneuploid clone showing 7 chromosomes with an  
214 average trisomy apart from the usual average tetrasomy in Chr31 and (ii) BPK081 cl8, showing  
215 an average disomy for all chromosomes except Chr31 (average tetrasomic); for simplicity, we  
216 will call BPK081 cl8 the ‘diploid’ clone. First analyses of the SCGS data were made with the Cell  
217 Ranger DNA<sup>TM</sup> pipeline. Although the software was developed for mammalian genomes, which  
218 are up to 2 orders of magnitude larger than *Leishmania*’s nuclear genome, it allowed detecting  
219 (i) aneuploidy, (ii) mosaicism and (iii) large intrachromosomal CNVs, as, for instance, the H- and  
220 M- amplicons (Downing et al., 2011) in Chr23 and Chr36 respectively (Suppl. fig 2). However,  
221 technical artifacts were noticed especially in BPK081 cl8, where the software’s GC bias  
222 correction algorithm, designed for the mammalian genome which display a lower average GC  
223 content compared to *Leishmania*, ended up overcompensating the depth of bins with high GC  
224 content (Suppl. fig 2). Because of that and given our main goal of using SCGS to study mosaic  
225 aneuploidy, we built our own analytical bioinformatic pipeline with a higher emphasis on  
226 estimating whole chromosomes copy numbers rather than local CNVs (Suppl. fig 3).

227 We evaluated the SCGS method and our analytical pipeline by first addressing their ability to  
228 explore karyotype heterogeneity among *Leishmania* cells of clones BPK282 cl4 and BPK081 cl8.  
229 Using our analytical pipeline, we identified 208 different karyotypes among the 1516 filtered  
230 cells of BPK282 cl4 and 117 karyotypes among the 2378 filtered cells of BPK081 cl8 (fig.1 A-B,  
231 Suppl. fig 5 A-B). Moreover, the cumulative SCGS profile of each clone was consistent with their  
232 respective Kp (fig. 1A and 1B, left panel). Notably, Chr13, which displays a non-integer average  
233 somy value (2.26) in the Kp of BPK282 cl4, was found as disomic and trisomic at relatively high  
234 proportions in the SCGS, resulting in a similar cumulative somy (2.34). As expected, the vast  
235 majority of cells in BPK081 cl8 displayed an almost diploid karyotype, with only Chr31 displaying  
236 a tetrasomy as expected. Small subpopulations of cells displaying highly aneuploid karyotypes  
237 were also observed in BPK081 cl8 (discussed below).

238 Mosaic aneuploidy in *Leishmania* has been studied so far with fluorescence in situ  
239 hybridization (FISH), the only alternative method available hitherto to estimate the copy  
240 number of some chromosomes in individual *Leishmania* cells. As a mutual benchmark of both  
241 FISH and SCGS methods, we submitted cells from both BPK282 cl4 and BPK081 cl8 to FISH to  
242 estimate the copy number of chromosomes 1, 5 and 22 and to compare the obtained results  
243 with the values observed in our SCGS data (fig. 1C). Overall, for each chromosome, the same  
244 predominant somy was observed with both methods, even when the predominant somy was  
245 different between clones. For instance, FISH and SCGS report Chr5 in BPK282 cl4 as trisomic in  
246 most cells, while it is reported as mainly disomic in BPK081 cl8 also by both techniques. Most  
247 discrepancies between the proportions obtained by both methods are within the 10% error  
248 margin previously estimated for FISH (Sterkers et al., 2011 and unpublished results). The main  
249 exception is Chr5 in BPK282, which is estimated as trisomic in 93% of the cells with SCGS and  
250 66% with FISH. However, SCGS reports proportions which are more consistent with the average  
251 somy values obtained by the BGS analysis of each clone. For instance, the weighted mean  
252 between somy values obtained with SCGS for Chr5 in BPK282 cl4 results in an average somy of  
253 2.95, which is very similar to the average somy value obtained by BGS (2.97), whereas with FISH,  
254 the average somy is lower (2.66), suggesting that the proportions observed with SCGS are more  
255 accurate.

256 We executed an extra experiment to evaluate the performance of SCGS in dealing with  
257 populations with highly heterogeneous karyotypes. In this experiment, a ‘super-mosaic’  
258 population was generated by mixing 4 different *L. donovani* strains that display very distinct  
259 Kp’s (Imamura et al., 2016), into a single SCGS run. A total of 1900 promastigotes were  
260 individually sequenced, of which, 1636 remained after data filtering. This ‘super mosaic’  
261 population displayed a high aneuploidy diversity: 388 identified karyotypes in total. As  
262 expected, the 1636 promastigotes formed four distinct clusters based on their integer somy  
263 values, with discrete differences in the aneuploidy patterns between each cluster (fig. 1D). Since  
264 one of the strains (HU3) used in this super mosaic is phylogenetically distant from the other 3  
265 strains (BPK475, BPK498 and BPK506), we could distinguish HU3 promastigotes from the others  
266 based on their SNP profiles. Interestingly, all HU3 cells were grouped together in cluster C (fig.  
267 1D – orange lines in the annotation bar), suggesting that the discrete karyotypic differences  
268 between the major clusters reflect differences among the aneuploidy profiles of the four  
269 strains, so that each cluster likely represents one of the strains. Thus, this experiment

270 demonstrates that SCGS is effective in distinguishing karyotypes even in very complex  
271 populations.

272 The 'super-mosaic' population was also used to estimate the frequency of doublets, i.e, the  
273 inclusion in a single droplet of two or more cells sharing the same 10X barcode. Based on the  
274 SNP profile of the HU3 line, each dataset with the same barcode containing either none of the  
275 HU3-specific SNPs (< 5% of the SNPs), or almost all of the HU3-specific SNPs (> 95% of the SNPs)  
276 were defined as singlets, while doublets contained a mixture of HU3-specific SNPs and positions  
277 resembling the reference genome. Using this approach, from the 293 cells that were predicted  
278 as HU3 based on their SNP profile (including cells removed from karyotype estimation), 21 were  
279 predicted as doublets (fig. 1D; purple lines in the annotation bar), with a detection rate of SNPs  
280 varying between 14% and 58%. Since doublets formed by two HU3 cells would still be defined  
281 as a singlet and given that HU3 cells correspond to 15,4% of the population, we assumed that  
282 the 21 detected HU3+BPK doublets correspond to 84,6% of the total number of doublets  
283 containing an HU3 cell. Thus, we estimate that there are ~4 (the extra 15,4%) additional  
284 HU3+HU3 doublets, resulting in a total of 25 doublets. Extrapolating this fraction of 25 out of  
285 293 HU3 cells to the whole single cell population would correspond to a relative fraction of  
286 doublets of 8,53%, a frequency which is higher than anticipated for mammal cells according to  
287 the manufacturer's guidelines (~1,4%). From the 21 detected doublets, 3 were originally  
288 removed from karyotype estimation due to high intra-chromosomal variation, and 6 displayed  
289 a karyotype that was also found in other cells. However, 11 karyotypes were exclusively found  
290 in one of the detected doublets (fig. 1E), indicating that a fraction of the low-occurrence  
291 karyotypes might be artifacts due to doublets.

292

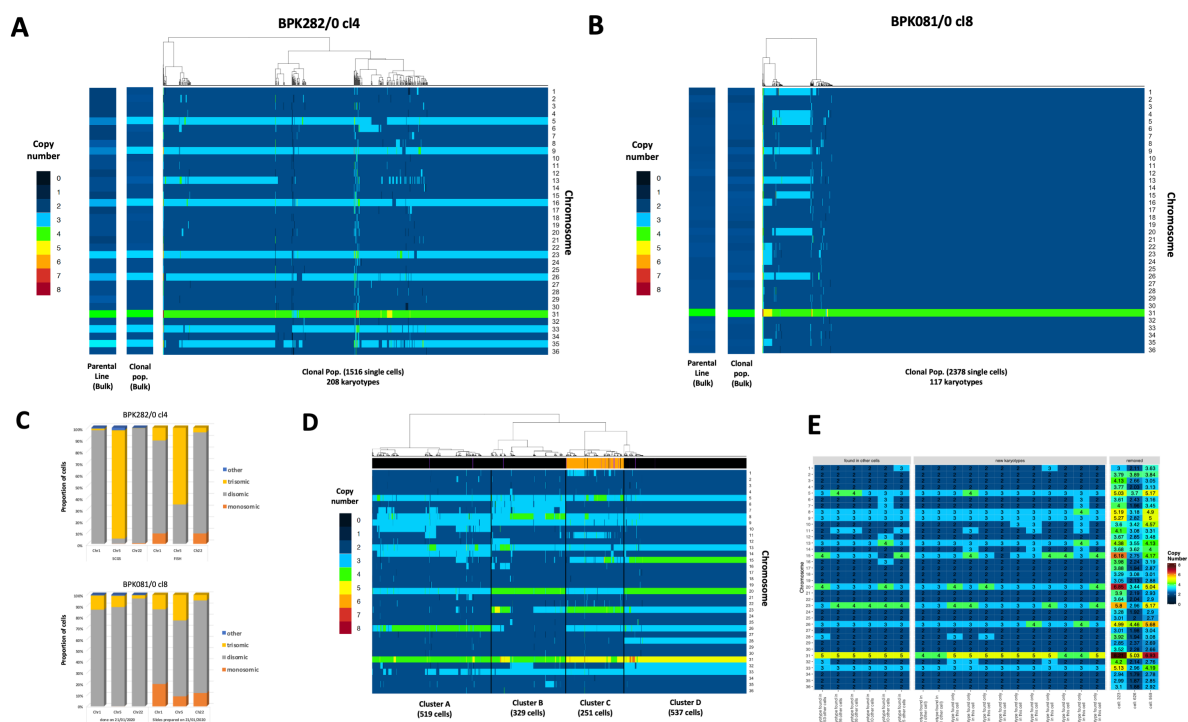

**Figure 1** - Mosaic aneuploidy in BPK282 cl4 and BPK081 cl8 clones revealed by SCGS and validation of the method. **A-B.** Heat maps displaying the copy number of all 36 chromosomes of promastigotes from BPK282 cl4 (A) or BPK081 cl8 (B) clones (main panels). Each column represents a single parasite. The number of sequenced promastigotes and karyotypes found in each sample is described in the x axis. In each panel, two insets display the Kp of the clonal population used in the SCGS and their respective parental strain. **C.** Comparison between FISH and SCGS. The proportion of cells displaying monosomy, disomy or trisomy for chromosomes 1, 5 and 22 in each method is represented. **D.** Heat map displaying the karyotypes of the promastigotes from 4 different strains mixed in a single SCGS run. Cells were hierarchically clustered according to their karyotypes, forming 4 major clusters. The number of cells in each cluster is indicated in the x axis. The bar at the top of the heatmap indicate if the SNP profile of the cell correspond to a BPK strain (black), a HU3 strain (orange) or a doublet (purple). **E.** Karyotypes of cells marked as doublets. The number of other cells displaying the same karyotype as the doublet is indicated in the x axis labels. Cells that were removed from analysis due to high intra-chromosomal variation and therefore did not have their somy values converted to integers are separated in the right panel, displaying their raw somy values instead. The integer somy values (left panels) or the raw somy values (right panel) are numerically indicated inside the heat map.

294 **BPK282 and BPK081 cells display different patterns of karyotype evolution during clonal**  
295 **expansion**

296 After validating the SCGS method for resolving complex karyotype heterogeneity in  
297 *Leishmania*, we returned to the data of BPK282 cl4 and BPK081 cl8 to characterize the  
298 karyotypes that are present in each clone. In BPK282 cl4, the most frequent karyotypes were  
299 very similar to each other, diverging by copy number changes in 1 to 3 chromosomes when  
300 compared to the most frequent karyotype (kar1 – fig. 2A). In BPK081 cl8, however, the nearly  
301 diploid kar1, which was present in 82% of the cells, and the 2 next most abundant karyotypes  
302 showed very different aneuploidy profiles, diverging by copy numbers of 8 to 10 chromosomes  
303 (fig. 2B). In addition, in both clones, the most frequent karyotype (kar1) is similar to the Kp of  
304 the respective parent strain from which each clone was derived (fig. 1 A-B, left panel),  
305 suggesting that, in each clone, kar1 corresponds to the karyotype of the founder cell, and thus,  
306 the other karyotypes of each population arose from their respective kar1.

307 To develop a hypothesis of the karyotype evolution during expansion of both BPK282 cl4 and  
308 BPK081 cl8 populations, we built a dissimilarity network based on the number of chromosomes  
309 with different copy numbers between each karyotype found in each population (fig. 2C). Both  
310 populations of cells are at different stages of expansion (about 126 and 56 generations since  
311 cloning, respectively), but we observe in each of them a proportionally comparable number of  
312 somy changes events (steps in the network): (i) for BPK282 cl4, 514 steps/126 generations/1516  
313 sequenced cells = 0.0027 and (ii) for BPK081cl8, 260 steps/56 generations/2378 sequenced  
314 cells = 0.002. However, distinct patterns are observed between both clones. In BPK282 cl4, the  
315 most frequent karyotypes (black nodes) are linked to each other by somy changes in only single  
316 chromosomes (black lines). Assuming kar1 as the founder of this population, almost every  
317 frequent karyotype can be traced back to it through cumulative single copy number alterations.  
318 In contrast, the network of BPK081 cl8 shows a very distinct pattern (fig. 2C). Here, the 3 most  
319 frequent karyotypes are distant from one another and lack single-step intermediates between  
320 them.

321

322

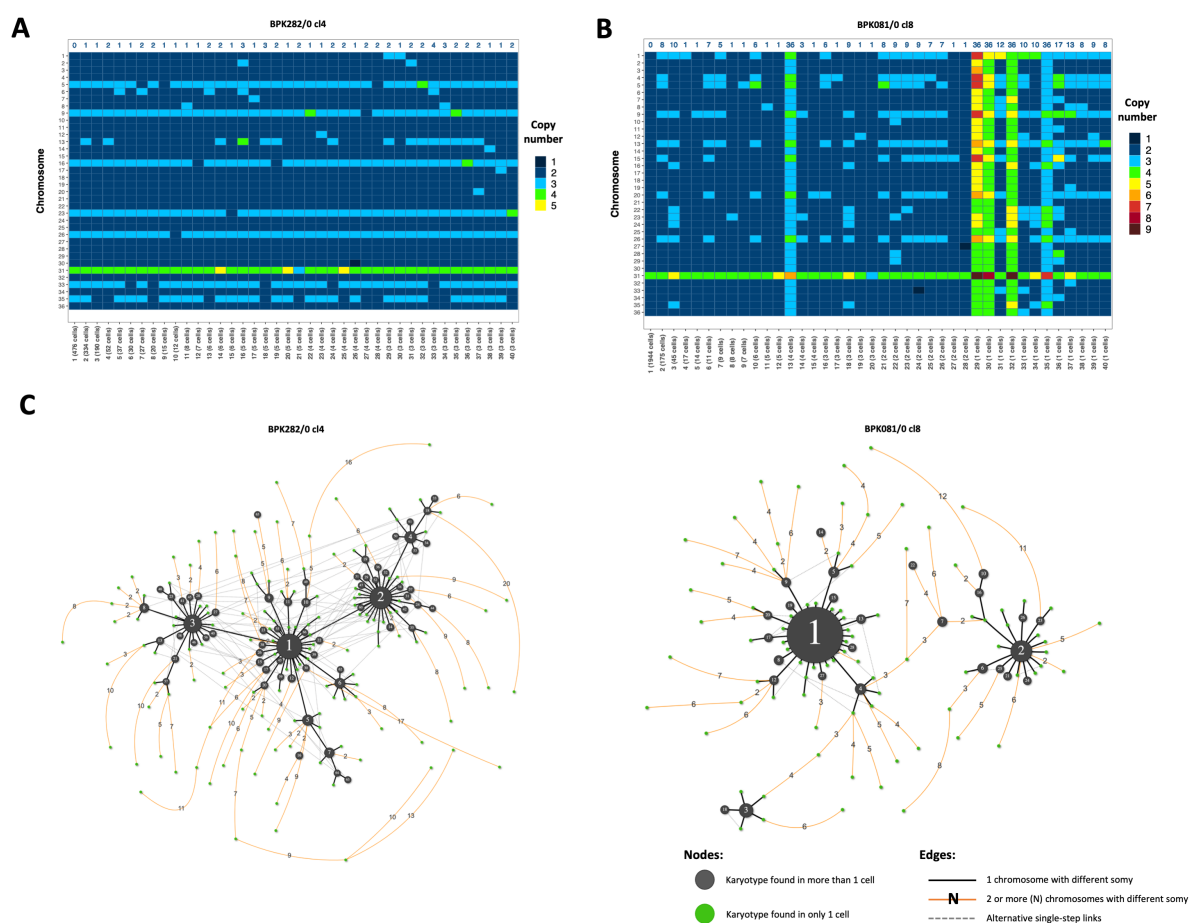

**Figure 2 - BPK282 c14 and BPK081 c18 display different profiles in the dissimilarity relationship between karyotypes.** A-B. Heat map depicting the 40 most frequent karyotypes in BPK282 c14 (A) and BPK081 c18 (B) clones. The blue numbers in the top indicate the total number of chromosomes with a different somy compared to kar1. C. Network representing the dissimilarity relationship between karyotypes in each clone. Black nodes represent karyotypes found in more than one cell, with their size proportional to the number of cells. Green nodes indicate karyotypes which occur only once. Black lines link two karyotypes which diverge by a somy difference in a single chromosome, while orange lines link karyotypes diverging by two or more chromosomes with different somy, with the number of divergent chromosomes indicated in the edge. Dashed grey lines show alternative links between karyotypes with a single somy divergence. Polyploidy karyotypes were not included in the networks.

323

## 324 **Selective forces restrict high frequencies of polysomies to a specific group of chromosomes**

325 We and others have demonstrated that high frequencies of polysomies were restricted to a  
326 specific subset of chromosomes when comparing the Kp's of 204 *L. donovani* strains previously  
327 analyzed by BGS (Barja et al., 2017; Imamura et al., 2016). To address if the same applies to  
328 single *Leishmania* cells, we created a diverse artificial population by randomly selecting and  
329 merging the data of equal numbers of single cells from BPK282 cl4 and BPK081 cl8 as well as  
330 from each cluster of the super mosaic, assuming each cluster represents one of the mixed  
331 strains. In this artificial population, we observed that at least 16 chromosomes are consistently  
332 disomic in the vast majority of cells in a clone/strain-independent manner (fig. 3A). All these  
333 chromosomes also show an average disomy in the Kp of most of the 204 strains mentioned  
334 above (supp. fig. 7A-B). Conversely, apart from the usually tetrasomic Chr31, 8 chromosomes  
335 (Chr5, Chr8, Chr9, Chr13, Chr20, Chr23, Chr26 and Chr33) are found with 3 or more copies in  
336 most cells of BPK282 cl4 and BPK081 cl8, again fitting with previous observations made on the  
337 204 *L. donovani* strains (Barja et al., 2017; Imamura et al., 2016). However, it is unclear whether  
338 (i) the disparity in the frequency of polysomies between chromosomes is due to intrinsic  
339 differences in the chances of overamplification of each chromosome along the expansion of the  
340 population (some chromosomes being specifically 'unstable') or (ii) if every chromosome has  
341 the potential to become polysomic but the expansion of polysomies in a population is  
342 determined by selective pressures. To address this, we revisited the karyotype network of each  
343 population (including the 'super-mosaic' – supp. fig. 7C), to investigate which were the  
344 chromosomes that were more prone to somy alterations in the rare karyotypes (i.e., karyotypes  
345 occurring in only a single cell), compared to the common karyotypes (i.e., karyotypes occurring  
346 in 2 or more cells) (fig. 3B). As expected, the 16 chromosomes which are predominantly found  
347 as disomic display little, if any, alteration events in their copy numbers in the common  
348 karyotypes. However, between the rare karyotypes, all chromosomes are susceptible to somy  
349 alterations with relatively similar frequencies, although polysomy-prone chromosomes still  
350 display a higher alteration frequency ( $p$ -value  $< 0.0001$  – supp. fig. 7D). These observations  
351 suggest that the capacity for aneuploidy is not restricted to a specific group of 'unstable'  
352 chromosomes.

353 We also investigated the role of the synchronous fluctuation in the copy number of multiple  
354 chromosomes in determining the abundance of karyotypes. For that, we estimated Pearson  
355 correlations between the copy number of chromosomes across equal numbers of cells from all

356 clones/strains sequenced here (supp. fig. 7E). Between the 8 polysomy-prone chromosomes  
357 and among the cells with common karyotypes, we observed numerous and relatively strong  
358 correlations, with the strongest correlations occurring between Chr5 and Chr9, and Chr8 and  
359 Chr20 (fig. 3C). On the other hand, between cells with rare karyotypes, there were fewer and  
360 in general weaker correlations (fig. 3D). These observations suggest that the expansion of  
361 polysomies in a population happens in an interdependent manner between chromosomes.

### 362 **Functional characterization of the polysomy-prone chromosomes**

363 In order to investigate potential features specific to the polysomy-prone chromosomes that  
364 could be related to their higher frequency of polysomies, we first applied an unsupervised Gene  
365 Ontology (GO) analysis to look for enrichment of biological functions in the polysomy-prone  
366 chromosomes. However, no obvious relationships between chromosomal gene content and  
367 prevalence of polysomies could be found (supp. fig. 8A). We then tried a supervised approach.  
368 Since highly aneuploid karyotypes are more frequently observed in in vitro promastigotes than  
369 in amastigotes, we reasoned that the amplification of the polysomic-prone chromosomes might  
370 affect pathways related to the promastigote stage. Thus, we selected enriched GO classes which  
371 were obtained from a previously published study in which we studied differential expression  
372 between promastigote and amastigote cell cultures (Dumetz et al., 2017). The distribution of  
373 the corresponding genes on the polysomy-prone chromosomes was compared to the  
374 distribution on chromosomes with a stable disomy. However, this approach also did not  
375 disclose biological functions located on the amplified chromosomes (supp. fig. 8B). Alternatively  
376 to GO analysis, we finally performed an in silico scan for small non-coding RNAs to investigate  
377 their distribution throughout the *L. donovani* genome. This suggested an enrichment of small  
378 RNAs in some of the polysomy-prone chromosomes, especially small nucleolar RNAs (snoRNAs  
379 - fig. 3E). A significant number of hits for snoRNAs are mapped to Chr5, Chr26 and Chr33, which  
380 are among the chromosomes with the most frequent polysomies, as well as Chr35, which is  
381 trisomic in the majority of BPK282 cl4 cells and is also trisomic in the Kp of several *L. donovani*  
382 strains (Imamura et al., 2016). Although preliminary, this observation suggests a potential  
383 relationship between the snoRNAs content of a chromosome and its prevalence of polysomies  
384 in cultivated promastigotes.

385

386



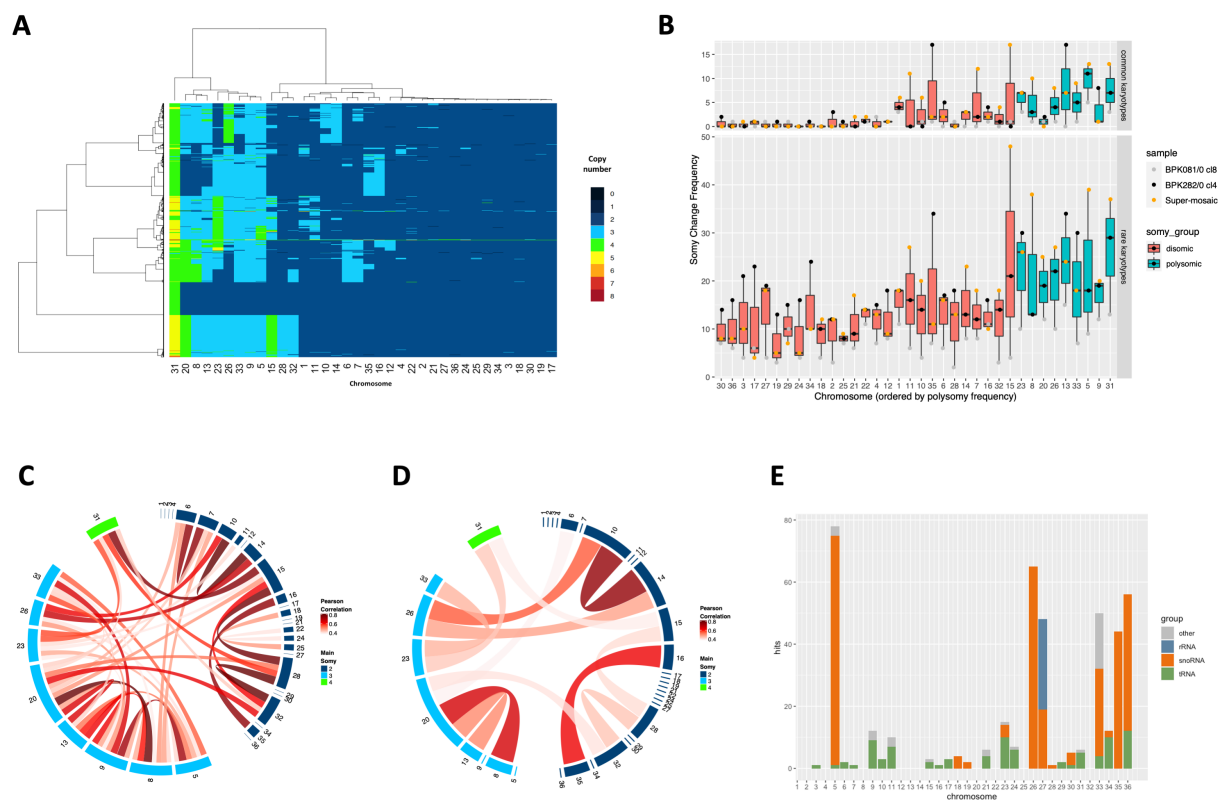

**Figure 3 - High frequencies of polysomies are restricted to a group of chromosomes.** **A.** Heat map depicting the copy number of the 36 chromosomes across promastigotes from different clones/strains. Here, 251 promastigotes of each cluster of the mixed sample and from BPK282 cl4 and BPK081 cl8 are represented. Chromosomes are hierarchically clustered based on their somy values. **B.** Boxplot indicating the number of somy change events for each chromosome among the common karyotypes (found in 2 or more cells – top panel) or the rare karyotypes (found in only one cell - bottom) in the 3 samples submitted to SCGS. **C-D.** Chord diagrams representing the Pearson correlation between the somies of all chromosomes among cells displaying the common karyotypes (**C**) or the rare karyotypes (**D**). Only correlations higher than 0.4 and with p.value lower than 0.05 are represented. **E.** Distribution of small non-coding RNAs across *L. donovani* genome. Ribosomal RNAs (rRNA), small nucleolar RNAs (snoRNAs) and transporter RNAs (tRNAs) were identified based on the Rfam database.

387

### 388 **SCGS reveals particular karyotypes among rare single cells**

389 As shown above, kar2 and kar3 of BPK081 cl8 show a baseline diploidy, i.e., the majority of  
390 chromosomes are disomic, with 8 to 10 trisomic chromosomes and tetrasomy or even a  
391 pentasomy for for Chr 31. However, we found in the same population 4 cells displaying a  
392 karyotype (kar13) with an aneuploidy profile similar to kar2, but with all chromosomes showing  
393 one extra copy (two extra copies for Chr31 - fig. 2B); thus in kar11, baseline somies are trisomic,  
394 8 chromosomes (the same as kar2) are tetrasomic and Chr31 is hexasomic, constituting a  
395 triploid karyotype (see supplementary text for details on how cells ploidies are determined).  
396 Similarly, at least 1 cell showed another karyotype (kar35) with baseline triploidy and  
397 aneuploidy on the same chromosomes as kar3 (fig. 2B) . Tetraploid karyotypes were also  
398 observed among BPK081 cl8 cells, but it is not possible to rule out that these are in fact doublets  
399 between two 2n cells with different karyotypes. Noteworthy, tetraploid karyotypes were not  
400 found in BPK282 cl4 and the only 3 cells identified with a potential baseline triploidy exhibited  
401 an aneuploidy pattern very distinctive from any other karyotype in that population (supp. fig.  
402 6). Moreover, within the BPK282 cl4 and BPK081 cl8 populations, we also observed rare cells  
403 displaying chromosomes with an estimated somy of 0 (nullisomy). The bam file of these cells  
404 showed that no reads were mapping to these chromosomes, suggesting that in these cells,  
405 these chromosomes were absent (fig. 4A). Nullisomic chromosomes were found in all the  
406 populations sequenced here: among which, 4 in BPK081 cl8 (0,15% of the sequenced cells) and  
407 15 from BPK282 cl4 (0,88%). Moreover, the aneuploidy profile of these nullisomic cells was not  
408 similar to any other karyotype identified in each sample (fig. 4B). Partial chromosome deletions  
409 were also observed, as for instance in Chr13 and Chr36 of the cell 688 from BPK282 cl4, in the  
410 Chr36 of the cell 266 from BPK081 cl8.

411

412

**A**

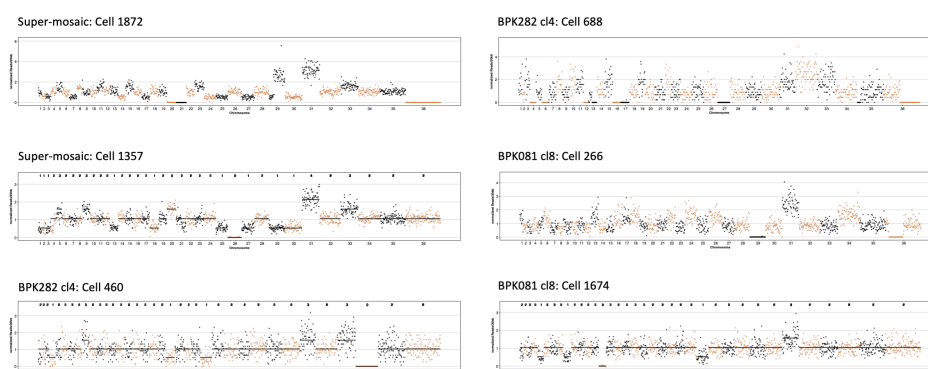

**B**

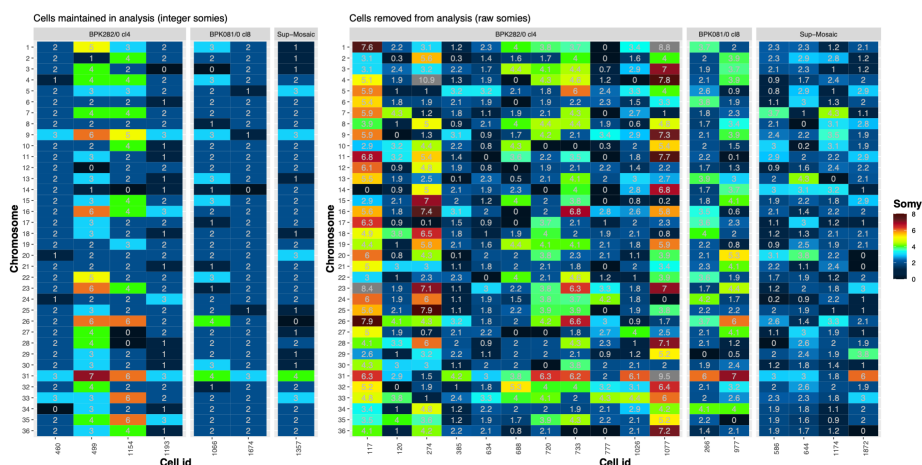

**Figure 4 - Cells with nullisomic chromosomes. A.** Example of cells displaying one or more nullisomic chromosomes. The dots represent the normalized read depth of each 20kb bin. The integer somy values calculated for each cell are depicted in the top part of each box for cells that were not excluded from analysis. A black line shows the integer somy values divided by the cell's scale factor ( $S_c$ ) for comparison. **B.** Karyotype of all cells with at least one nullisomic chromosome identified in our SCGS data. Cells that were removed from analysis and therefore did not have their somy values converted to integers are separated in the right panel, displaying their raw somy values instead.

413

414

415

## 416 **Discussion**

417 Cellular heterogeneity is increasingly implicated as one of the major sources of adaptive  
418 potential for unicellular pathogens (Bagamery et al., 2020; Seco-Hidalgo et al., 2015). We  
419 explored here a specific manifestation of this phenomenon, i.e., mosaic aneuploidy, in a unique  
420 model, *Leishmania*. By applying a high-throughput SCGS method, we could determine for the  
421 first time the complete karyotype of thousands of individual *Leishmania* cells from two distinct  
422 clonal populations in vitro. We found a high level of mosaic aneuploidy, affecting essentially the  
423 same, limited subset of chromosomes. We explored the evolution of mosaicism in both  
424 populations, starting from two distinct founder karyotypes, one nearly euploid and another  
425 highly aneuploid. We highlighted the adaptive potential of mosaic aneuploidy for unicellular  
426 organisms such as *Leishmania*, living in rapidly varying environments.

427 The present SCGS study allowed us to evaluate and extend hypotheses on mosaic aneuploidy  
428 in *Leishmania* previously based on FISH measurements (Sterkers et al., 2012, 2011). Although  
429 some divergencies were observed here between FISH and SCGS, our data are in agreement with  
430 most predictions. Accordingly, mosaic aneuploidy was confirmed in all populations sequenced  
431 here, and karyotypes frequency distributions, in particular for BPK282/0 cl4 clone (208  
432 karyotypes among 1516 cells), were similar to the distribution predicted with FISH data  
433 obtained for 7 chromosomes of a long-term cultivated *Leishmania major* population (~250  
434 karyotypes in ~2000 cells - Sterkers et al., 2012 – fig. 4). In BPK081/0 cl8, proportionally fewer  
435 karyotypes were identified compared to BPK282/0 cl4, which might be a consequence of either  
436 a reduced tendency of the founder diploid karyotype to some alterations and/or due to the fact  
437 this clone was at an earlier stage of expansion in vitro (~56 generations, compared to the ~126  
438 generations in BPK282). Indeed, when normalizing the number of karyotypes, similar values  
439 were observed for both clones: respectively  $10 \times 10^{-4}$  and  $9 \times 10^{-4}$  new  
440 karyotypes/generation/sequenced cell.

441 Our SCGS data, however, does not corroborate the previous assumptions that all  
442 chromosomes are found with at least two some states (Sterkers et al., 2012, 2011), as high  
443 levels of some variation were restricted to a subset of chromosomes in our experimental  
444 conditions. We also observed a higher tendency of FISH to report trisomies and monosomies in  
445 chromosomes which were defined by SCGS as mostly disomic in almost all cells of BPK282/0 cl4

446 and BPK081/0 cl8 clones, as chr01 and chr22. This discrepancy is likely due to accuracy  
447 limitations in FISH.

448 The SCGS data reported here also allowed us to draw some hypothesis regarding the origin  
449 and evolution of mosaic aneuploidy in vitro. We have previously demonstrated that intracellular  
450 amastigotes sequenced directly from patient samples usually display a diploid Kp similar to the  
451 Kp of the BPK081 cl8 clone, although variations in somies were observed in some samples  
452 (Domagalska et al., 2019). However, when these amastigotes were isolated from patients or  
453 experimental animals and transformed to promastigotes in vitro, in most cases their Kps  
454 progressively evolve towards highly aneuploid profiles (Domagalska et al., 2019; Dumetz et al.,  
455 2017; Giovanni Bussotti, a et al., 2018). Thus, the 2 clones here studied provide complementary  
456 models to understand the dynamics of the emergence of mosaic aneuploidy in vitro; BPK081/0  
457 cl8 which founder karyotype had the diploid profile, representing an early stage of adaptation  
458 to culture; and BPK282/0 cl4, which founder karyotype was already highly aneuploid (likely  
459 kar1), representing later stages.

460 In the BPK081 cl8, a minority of highly aneuploid subpopulations were observed, contrasting  
461 with the the founder diploid karyotype (kar1), indicating that at early stages of clonal expansion  
462 in culture, the evolution of mosaicism starts with drastic changes in karyotypes, in this case the  
463 observed changes in some of 8 to 10 chromosomes leading to highly aneuploid cells (kar2 and  
464 kar3). These drastic changes in somies could occur through cumulative small steps, i.e., some  
465 alterations in single chromosomes at each cell division, followed by fixation and further  
466 expansion of the fittest aneuploidies and loss of intermediate links between these karyotypes  
467 during clonal evolution. Alternatively, kar2 and kar3 in BPK081 cl8 may have originated  
468 independently from kar1 by simultaneous amplifications of multiple chromosomes. However,  
469 the presence of potentially triploid cells which resemble kar2 and kar3 opens other possibilities.  
470 On one hand, polyploidization has been demonstrated as an important mechanism in yeasts for  
471 quickly generating multiple and highly discrepant aneuploid karyotypes from a single parent  
472 through assorted mis-segregation of chromosomes during downstream cell divisions (Gerstein  
473 et al., 2015). In case a similar mechanism occurs in *Leishmania*, these 3n karyotypes found in  
474 BPK081 cl8 could represent an intermediate step between whole genome polyploidization  
475 event and reversion to aneuploid kar2 and kar3. On the other hand, 3n karyotypes could be  
476 reminiscent of hybridization, which was recently shown to occur in vitro (Louradour et al.,

477 2020); the common observation of 3n karyotypes in *Leishmania* after hybridization in sand flies  
478 supports this hypothesis (Akopyants et al., 2009; Inbar et al., 2019, 2013; Romano et al., 2014).

479 Surrounding the 3 major karyotypes in the network of BPK081/0 cl8, other minor karyotypes  
480 with single somy alterations are observed, suggesting that once a successful karyotype expands,  
481 small variations of it are continuously generated by small changes in somies. This pattern is  
482 more evident in the karyotype network of BPK282/0 cl4, where almost all karyotypes which are  
483 found in at least 2 cells are at one somy change distance from another karyotype, suggesting  
484 that these karyotypes were also continuously generated by cumulative steps of small somy  
485 alterations. Accordingly, the founder karyotype of this clone (likely kar1) was already highly  
486 aneuploid and well adapted to culture, as the parent population from which BPK282/0 cl4 was  
487 isolated was already in culture for 21 passages (supp. fig. 1).

488 Highly aneuploidy Kps are observed in most in vitro cultured *Leishmania* promastigotes  
489 analysed so far by BGS (Franssen et al., 2020; Imamura et al., 2016; Van den Broeck et al., 2020).  
490 This usually affects a specific group of chromosomes, largely overlapping with the 8 polysomy-  
491 prone chromosomes described here. The early amplifications reproducibly observed in the Kp  
492 of parasite populations in transition from in vivo to in vitro (Domagalska et al., 2019; Giovanni  
493 Bussotti, a et al., 2018) suggest an adaptative role for specific polysomies in adaptation to  
494 culture. However, the mechanisms that determine which chromosomes are amplified are still  
495 poorly understood.

496 By investigating which chromosomes were more prone to somy alterations in rare and  
497 common karyotypes, we gathered evidence suggesting that all chromosomes can be  
498 stochastically amplified during population expansion, potentially at different rates, but selective  
499 forces likely dictate the higher frequency of polysomies observed in some chromosomes.  
500 Changes in the average chromosome copy numbers of cell populations are directly reflected in  
501 the average amount of transcripts encoded by the genes present on these chromosomes (Barja  
502 et al., 2017; Dumetz et al., 2017) and to a certain degree also affect the average amount of  
503 certain proteins (Cuypers, 2018). Consequently, aneuploidy might lead to dosage imbalances  
504 between the product of genes located in chromosomes that display different somies. The  
505 frequently observed co-modulation of multiple chromosomes – estimated with Pearson  
506 correlations here and across the Kp of 204 *L. donovani* isolates as previously described (Barja et  
507 al., 2017) – might reflect a dynamic compensation mechanism that reduces these imbalances

508 and at the same time increases the dosage of key genes. Our GO analyses did not reveal any  
509 enrichment of biological functions in the (co-)amplified chromosomes. However, we observed  
510 an enrichment of snoRNA genes in some of the polysomy-prone chromosomes, accordingly  
511 Chr05, Chr26, Chr33 and Chr35. This class of small RNAs is involved in the extensive processing  
512 of ribosomal RNA (rRNA) characteristic of trypanosomatids, directly affecting ribosomal  
513 biosynthesis and ultimately translation, both increased in cultured promastigotes (Jara et al.,  
514 2017; Martínez-Calvillo et al., 2019). Amplification of these chromosomes as seen in many cells  
515 in vitro might ultimately boost the translation capacity of the cells due to a consequent higher  
516 abundance of snoRNAs. At the time of submission of the present article, a very recent study  
517 supporting and further addressing this hypothesis was pre-printed (Piel et al., 2021).

518 The high diversity of karyotypes identified in both models here described is in agreement  
519 with the idea of mosaic aneuploidy being a constitutive feature in *Leishmania* (Lachaud et al.,  
520 2014). The generation of karyotypic heterogeneity represents a source of functional diversity,  
521 due to variations in genes dosage (Dumetz et al., 2017), and it is also expected to facilitate the  
522 removal of detrimental mutations and the fixation of beneficial haplotypes (Barja et al., 2017;  
523 Sterkers et al., 2012). Although in a given environment some very different karyotypes might  
524 be limited to low frequencies, they may provide to the population a major (pre-)adaptation  
525 potential to unpredictable environmental changes, such as a change of host or drug pressure  
526 associated to chemotherapy (Dumetz et al., 2018, 2017; Shaw et al., 2016, 2020). Time-lapse  
527 SCGS studies of populations of parasites during clonal expansion under stable or varying  
528 environments are needed to test this pre-adaptation hypothesis. Combining SCGS with single-  
529 cell transcriptomics could also allow to understand better the impact of gene dosage imbalance  
530 on transcription with a single cell resolution. Thus, high throughput single-cell sequencing  
531 methods represent a remarkable tool to understand key aspects of *Leishmania* biology and  
532 adaptability.

533

534 **Acknowledgements**

535 This study received financial support from the Flemish Ministry of Science and Innovation (SOFI  
536 Grant MADLEI) and the Flemish Fund for Scientific Research (FWO, post-doctoral grant to  
537 FVdB). A.Y. was recipient of a grant from the Agence Nationale de la Recherche (ANR) within  
538 the frame of the “Investissements d'avenir” programme (ANR 11-LABX-0024-01 “ParaFrap”).

539 **Author contributions**

540 All authors have approved the submitted version of this manuscript and have agreed both to  
541 be personally accountable for their own contributions and to ensure that questions related to  
542 the accuracy or integrity of any part of the work are appropriately investigated and resolved.  
543 This work was conceived and designed by GN, JCD & MAD. Data were acquired and analyzed by  
544 GN, PM, HI, IM, NK, AY, YS, JCD and MAD. Data interpretation was made by GN, PM, FVdB, YS,  
545 JCD and MAD. Paper was drafted by GN, PM, JCD and MAD and substantively revised by HI,  
546 FVdB and YS.

547



548 **References**

- 549 Adl SM, Simpson AG, Lane CE, Lukeš J, Bass D, Bowser SS, Brown M, Burki F, Dunthorn M, Hampl  
550 V, Heiss A, Hoppenrath M, Lara E, Lynn DH, Mcmanus H, Mitchell EAD, Mozley-Stanridge SE,  
551 Parfrey LW, Pawlowski J, Rueckert S, Shadwick L, Schoch C, Smirnov A, Spiegel FW, Ca SA. 2012.  
552 The revised classification of eukaryotes HHS Public Access. *J Eukaryot Microbiol Microbiol*  
553 **59**:429–493. doi:10.1111/j.1550-7408.2012.00644.x.The
- 554 Akopyants NS, Kimblin N, Secundino N, Patrick R, Peters N, Lawyer P, Dobson DE, Beverley SM,  
555 Sacks DL. 2009. Demonstration of Genetic Exchange During Cyclical Development of  
556 *Leishmania* in the Sand Fly Vector. *Science (80- )* **324**:265 LP – 268.  
557 doi:10.1126/science.1169464
- 558 Almende B.V., Thieurmel B, Robert T. 2019. visNetwork: Network Visualization using “vis.js”  
559 Library.
- 560 Altschul SF, Madden TL, Schäffer AA, Zhang J, Zhang Z, Miller W, Lipman DJ. 1997. Gapped BLAST  
561 and PSI-BLAST: a new generation of protein database search programs. *Nucleic Acids Res*  
562 **25**:3389–3402. doi:10.1093/nar/25.17.3389
- 563 Aslett M, Aurrecochea C, Berriman M, Brestelli J, Brunk BP, Carrington M, Depledge DP, Fischer  
564 S, Gajria B, Gao X, Gardner MJ, Gingle A, Grant G, Harb OS, Heiges M, Hertz-Fowler C, Houston  
565 R, Innamorato F, Iodice J, Kissinger JC, Kraemer E, Li W, Logan FJ, Miller JA, Mitra S, Myler PJ,  
566 Nayak V, Pennington C, Phan I, Pinney DF, Ramasamy G, Rogers MB, Roos DS, Ross C, Sivam D,  
567 Smith DF, Srinivasamoorthy G, Stoeckert CJ, Subramanian S, Thibodeau R, Tivey A, Treatman C,  
568 Velarde G, Wang H. 2009. TriTrypDB: A functional genomic resource for the Trypanosomatidae.  
569 *Nucleic Acids Res* **38**:457–462. doi:10.1093/nar/gkp851
- 570 Bagamery LE, Justman QA, Garner EC, Murray AW. 2020. A Putative Bet-Hedging Strategy  
571 Buffers Budding Yeast against Environmental Instability. *Curr Biol* 1–16.  
572 doi:10.1016/j.cub.2020.08.092
- 573 Barja PP, Pescher P, Bussotti G, Dumetz F, Imamura H, Kedra D, Domagalska MA, Chaumeau V,  
574 Himmelbauer H, Pages M, Sterkers Y, Dujardin J-C, Notredame C, Späth GF. 2017. Haplotype  
575 selection as an adaptive mechanism in the protozoan pathogen *Leishmania donovani*. *Nat Ecol*  
576 *Evol* **1**:1961–1969. doi:10.1038/s41559-017-0361-x

- 577 Beach RR, Ricci-Tam C, Brennan CM, Moomau CA, Hsu P hsin, Hua B, Silberman RE, Springer M,  
578 Amon A. 2017. Aneuploidy Causes Non-genetic Individuality. *Cell* **169**:229-242.e21.  
579 doi:10.1016/j.cell.2017.03.021
- 580 Benaglia T, Chauveau D, Hunter DR, Young D. 2009. {mixtools}: An {R} Package for Analyzing  
581 Finite Mixture Models. *J Stat Softw* **32**:1–29.
- 582 Clayton C. 2019. Regulation of gene expression in trypanosomatids: Living with polycistronic  
583 transcription. *Open Biol* **9**. doi:10.1098/rsob.190072
- 584 Cuypers B. 2018. A systems biology approach for a comprehensive understanding of molecular  
585 adaptation in *Leishmania donovani*.
- 586 Domagalska MA, Imamura H, Sanders M, Van den Broeck F, Bhattarai NR, Vanaerschot M, Maes  
587 I, D’Haenens E, Rai K, Rijal S, Berriman M, Cotton JA, Dujardin J-C. 2019. Genomes of *Leishmania*  
588 parasites directly sequenced from patients with visceral leishmaniasis in the Indian  
589 subcontinent. *PLoS Negl Trop Dis* **13**:e0007900. doi:10.1371/journal.pntd.0007900
- 590 Downing T, Imamura H, Decuypere S, Clark TG, Coombs GH, Cotton JA, Hilley JD, De Doncker S,  
591 Maes I, Mottram JC, Quail MA, Rijal S, Sanders M, Schönian G, Stark O, Sundar S, Vanaerschot  
592 M, Hertz-Fowler C, Dujardin J-C, Berriman M. 2011. Whole genome sequencing of multiple  
593 *Leishmania donovani* clinical isolates provides insights into population structure and  
594 mechanisms of drug resistance. *Genome Res* **21**:2143–2156. doi:10.1101/gr.123430.111
- 595 Dumetz F, Cuypers B, Imamura H, Zander D, D’Haenens E, Maes I, Domagalska MA, Clos J,  
596 Dujardin J-C, De Muylder G. 2018. Molecular Preadaptation to Antimony Resistance in  
597 *Leishmania donovani* on the Indian Subcontinent. *mSphere* **3**:e00548-17.  
598 doi:10.1128/mSphere.00548-17
- 599 Dumetz F, Imamura H, Sanders M, Seblova V, Myskova J, Pescher P, Vanaerschot M, Meehan  
600 CJ, Cuypers B, De Muylder G, Späth GF, Bussotti G, Vermeesch JR, Berriman M, Cotton JA, Volf  
601 P, Dujardin J-C, Domagalska MA. 2017. Modulation of aneuploidy in *leishmania donovani* during  
602 adaptation to different in vitro and in vivo environments and its impact on gene expression.  
603 *MBio* **8**:1–14. doi:10.1128/mBio.00599-17
- 604 Franssen SU, Durrant C, Stark O, Moser B, Downing T, Imamura H, Dujardin JC, Sanders MJ,

- 605 Mauricio I, Miles MA, Schnur LF, Jaffe CL, Nasereddin A, Schallig H, Yeo M, Bhattacharyya T,  
606 Alam MZ, Berriman M, Wirth T, Schönian G, Cotton JA. 2020. Global genome diversity of the  
607 *Leishmania donovani* complex. *Elife* **9**:1–44. doi:10.7554/eLife.51243
- 608 Gerstein AC, Fu MS, Mukaremera L, Li Z, Ormerod KL, Fraser JA, Berman J, Nielsen K. 2015.  
609 Polyploid titan cells produce haploid and aneuploid progeny to promote stress adaptation.  
610 *MBio* **6**:1–14. doi:10.1128/mBio.01340-15
- 611 Gilchrist C, Stelkens R. 2019. Aneuploidy in yeast: Segregation error or adaptation mechanism?  
612 *Yeast* **36**:525–539. doi:10.1002/yea.3427
- 613 Giovanni Bussotti, a B, Evi Gouzelou B, Mariana Côrtes Boité, c Ihcen Kherachi D, Zoubir Harrat,  
614 d Naouel Eddaikra D, Jeremy C. Mottram, e Maria Antoniou F, Vasiliki Christodoulou F, Aymen  
615 Bali, g H, Fatma Z. Guerfali, g, h Dhafer Laouini, g H, Maowia Mukhtar I, Franck Dumetz, j Jean-  
616 Claude Dujardin, j K, Despina Smirlis L, Pierre Lechat, a Pascale Pescher B, Adil El Hamouchi M,  
617 Meryem Lemrani, m Carmen Chicharro N, Ivonne Pamela Llanes-Acevedo, n Laura Botana, n  
618 Israel Cruz, n Javier Moreno, n Fakhri Jeddi, h O, Karim Aoun, h O, Aïda Bouratbine, h, o Elisa  
619 Cupolillo c GFS. 2018. Leishmania Genome Dynamics during Environmental Adaptation Reveal  
620 Strain-Specific Differences in Gene Copy Number Variation, Karyotype Instability, and Telomeric  
621 Amplification. *MBio* **9**:1–18. doi:10.1128/mBio.01399-18
- 622 Hirakawa M, Chyou D, Huang D, Slan A, Bennett R. 2017. Parasex Generates Phenotypic  
623 Diversity and Impacts Drug Resistance and Virulence in . *Genetics* **207**:1195–1211.  
624 doi:10.1534/genetics.117.300295/-/DC1.1
- 625 Holland AJ, Cleveland DW. 2009. Boveri revisited: Chromosomal instability, aneuploidy and  
626 tumorigenesis. *Nat Rev Mol Cell Biol* **10**:478–487. doi:10.1038/nrm2718
- 627 Hu G, Wang J, Choi J, Jung WH, Liu I, Litvintseva AP, Bicanic T, Aurora R, Mitchell TG, Perfect JR,  
628 Kronstad JW. 2011. Variation in chromosome copy number influences the virulence of  
629 *Cryptococcus neoformans* and occurs in isolates from AIDS patients. *BMC Genomics* **12**.  
630 doi:10.1186/1471-2164-12-526
- 631 Imamura H, Downing T, van den Broeck F, Sanders MJ, Rijal S, Sundar S, Mannaert A,  
632 Vanaerschot M, Berg M, de Muylder G, Dumetz F, Cuypers B, Maes I, Domagalska MA,  
633 Decuypere S, Rai K, Uranw S, Bhattarai NR, Khanal B, Prajapati VK, Sharma S, Stark O, Schönian

- 634 G, de Koning HP, Settimo L, Vanhollebeke B, Roy S, Ostyn B, Boelaert M, Maes L, Berriman M,  
635 Dujardin J-C, Cotton JA. 2016. Evolutionary genomics of epidemic visceral leishmaniasis in the  
636 Indian subcontinent. *Elife* **5**:1–39. doi:10.7554/eLife.12613
- 637 Inbar E, Akopyants NS, Charmoy M, Romano A, Lawyer P, Elnaïem DEA, Kauffmann F, Barhoumi  
638 M, Grigg M, Owens K, Fay M, Dobson DE, Shaik J, Beverley SM, Sacks D. 2013. The Mating  
639 Competence of Geographically Diverse *Leishmania major* Strains in Their Natural and Unnatural  
640 Sand Fly Vectors. *PLoS Genet* **9**. doi:10.1371/journal.pgen.1003672
- 641 Inbar E, Id JS, Id SAI, Romano A, Nzelu CO, Owens K, Sanders MJ, Id DD, Id JAC, Grigg ME, Id  
642 SMB, Id DS. 2019. Whole genome sequencing of experimental hybrids supports meiosis-like  
643 sexual recombination in *Leishmania* 1–28.
- 644 Jara M, Berg M, Caljon G, de Muylder G, Cuypers B, Castillo D, Maes I, Orozco M del C,  
645 Vanaerschot M, Dujardin J-C, Arevalo J, Cuypers B, del Carmen Orozco M, Vanaerschot M,  
646 Dujardin J-C, Arevalo J. 2017. Macromolecular biosynthetic parameters and metabolic profile in  
647 different life stages of *Leishmania braziliensis*: Amastigotes as a functionally less active stage.  
648 *PLoS One* **12**:1–22.
- 649 Kalvari I, Nawrocki EP, Ontiveros-Palacios N, Argasinska J, Lamkiewicz K, Marz M, Griffiths-Jones  
650 S, Toffano-Nioche C, Gautheret D, Weinberg Z, Rivas E, Eddy SR, Finn RDD, Bateman A, Petrov  
651 AI. 2021. Rfam 14: expanded coverage of metagenomic, viral and microRNA families. *Nucleic  
652 Acids Res* **49**:D192–D200. doi:10.1093/nar/gkaa1047
- 653 Kang HM, Subramaniam M, Targ S, Nguyen M, Maliskova L, McCarthy E, Wan E, Wong S, Byrnes  
654 L, Lanata CM, Gate RE, Mostafavi S, Marson A, Zaitlen N, Criswell LA, Ye CJ. 2018. Multiplexed  
655 droplet single-cell RNA-sequencing using natural genetic variation. *Nat Biotechnol* **36**:89–94.  
656 doi:10.1038/nbt.4042
- 657 Lachaud L, Bourgeois N, Kuk N, Morelle C, Crobu L, Merlin G, Bastien P, Pagès M, Sterkers Y.  
658 2014. Constitutive mosaic aneuploidy is a unique genetic feature widespread in the *Leishmania*  
659 genus. *Microbes Infect* **16**:61–66. doi:10.1016/j.micinf.2013.09.005
- 660 Li H, Durbin R. 2009. Fast and accurate short read alignment with Burrows-Wheeler transform.  
661 *Bioinformatics* **25**:1754–1760. doi:10.1093/bioinformatics/btp324

- 662 Li H, Handsaker B, Wysoker A, Fennell T, Ruan J, Homer N, Marth G, Abecasis G, Durbin R. 2009.  
663 The Sequence Alignment/Map format and SAMtools. *Bioinformatics* **25**:2078–2079.  
664 doi:10.1093/bioinformatics/btp352
- 665 Louradour I, Ferreira TR, Ghosh K, Shaik J, Sacks DL. 2020. In Vitro Generation of Leishmania  
666 Hybrids. *Cell Rep* **31**:107507. doi:10.1016/j.celrep.2020.03.071
- 667 Mannaert A, Downing T, Imamura H, Dujardin J-C. 2012. Adaptive mechanisms in pathogens:  
668 Universal aneuploidy in Leishmania. *Trends Parasitol* **28**:370–376. doi:10.1016/j.pt.2012.06.003
- 669 Martínez-Calvillo S, Florencio-Martínez LE, Nepomuceno-Mejía T. 2019. Nucleolar Structure and  
670 Function in Trypanosomatid Protozoa. *Cells* **8**:421. doi:10.3390/cells8050421
- 671 Mulla W, Zhu J, Li R. 2014. Yeast: A simple model system to study complex phenomena of  
672 aneuploidy. *FEMS Microbiol Rev* **38**:201–212. doi:10.1111/1574-6976.12048
- 673 Nawrocki EP, Eddy SR. 2013. Infernal 1.1: 100-fold faster RNA homology searches.  
674 *Bioinformatics* **29**:2933–2935. doi:10.1093/bioinformatics/btt509
- 675 Ni M, Feretzaki M, Li W, Floyd-Averette A, Mieczkowski P, Dietrich FS, Heitman J. 2013.  
676 Unisexual and Heterosexual Meiotic Reproduction Generate Aneuploidy and Phenotypic  
677 Diversity De Novo in the Yeast *Cryptococcus neoformans*. *PLoS Biol* **11**.  
678 doi:10.1371/journal.pbio.1001653
- 679 Paradis E. 2018. Analysis of haplotype networks: The randomized minimum spanning tree  
680 method. *Methods Ecol Evol* **9**:1308–1317. doi:10.1111/2041-210X.12969
- 681 Paradis E. 2010. Pegas: An R package for population genetics with an integrated-modular  
682 approach. *Bioinformatics* **26**:419–420. doi:10.1093/bioinformatics/btp696
- 683 Piel L, Rajan KS, Bussotti G, Varet H, Legendre R, Douché T, Giai-gianetto Q, Chaze T, Vojtkova  
684 B. 2021. Post-transcriptional regulation of Leishmania fitness gain. *bioRxiv*.
- 685 R Core Team. 2013. R: A Language and Environment for Statistical Computing.
- 686 Reis-Cunha JL, Valdivia HO, Bartholomeu DC. 2017. Gene and Chromosomal Copy Number  
687 Variations as an Adaptive Mechanism Towards a Parasitic Lifestyle in Trypanosomatids. *Curr*  
688 *Genomics* **19**:87–97. doi:10.2174/1389202918666170911161311

- 689 Rogers MB, Hilley JD, Dickens NJ, Wilkes J, Bates PA, Depledge DP, Harris D, Her Y, Herzyk P,  
690 Imamura H, Otto TD, Sanders M, Seeger K, Dujardin J-C, Berriman M, Smith DF, Hertz-Fowler C,  
691 Mottram JC. 2011. Chromosome and gene copy number variation allow major structural change  
692 between species and strains of *Leishmania*. *Genome Res* **21**:2129–42.  
693 doi:10.1101/gr.122945.111
- 694 Romano A, Inbar E, Debrabant A, Charmoy M, Lawyer P, Ribeiro-Gomes F, Barhoumi M, Grigg  
695 M, Shaik J, Dobson D, Beverley SM, Sacks DL. 2014. Cross-species genetic exchange between  
696 visceral and cutaneous strains of *Leishmania* in the sand fly vector. *Proc Natl Acad Sci*  
697 **111**:16808–16813. doi:10.1073/pnas.1415109111
- 698 Seco-Hidalgo V, Osuna A, De Pablos LM. 2015. To bet or not to bet: Deciphering cell to cell  
699 variation in protozoan infections. *Trends Parasitol* **31**:350–356. doi:10.1016/j.pt.2015.05.004
- 700 Selmecki A, Forche A, Berman J. 2006. Aneuploidy and isochromosome formation in drug-  
701 resistant *Candida albicans*. *Science (80- )* **313**:367–370. doi:10.1126/science.1128242
- 702 Shaw C, Lonchamp J, Downing T, Imamura H, Freeman TM, Cotton JA, Sanders M, Blackburn G,  
703 Dujardin J-C, Rijal S, Khanal B, Illingworth CJR, Coombs GH, Carter KC. 2016. In vitro selection of  
704 miltefosine resistance in promastigotes of *Leishmania donovani* from Nepal: Genomic and  
705 metabolomic characterization. *Mol Microbiol* **99**:1134–1148. doi:10.1111/mmi.13291
- 706 Shaw CD, Imamura H, Downing T, Blackburn G, Westrop GD, Cotton JA, Berriman M, Sanders  
707 M, Rijal S, Coombs GH, Dujardin JC, Carter KC. 2020. Genomic and Metabolomic Polymorphism  
708 among Experimentally Selected Paromomycin-Resistant *Leishmania donovani* Strains.  
709 *Antimicrob Agents Chemother* **64**. doi:10.1128/AAC.00904-19
- 710 Siegel JJ, Amon A. 2012. New insights into the troubles of aneuploidy. *Annu Rev Cell Dev Biol*  
711 **28**:189–214. doi:10.1146/annurev-cellbio-101011-155807
- 712 Sterkers Y, Lachaud L, Bourgeois N, Crobu L, Bastien P, Pagès M. 2012. Novel insights into  
713 genome plasticity in Eukaryotes: Mosaic aneuploidy in *Leishmania*. *Mol Microbiol* **86**:15–23.  
714 doi:10.1111/j.1365-2958.2012.08185.x
- 715 Sterkers Y, Lachaud L, Crobu L, Bastien P, Pagès M. 2011. FISH analysis reveals aneuploidy and  
716 continual generation of chromosomal mosaicism in *Leishmania major*. *Cell Microbiol* **13**:274–

717 283. doi:10.1111/j.1462-5822.2010.01534.x

718 Ubeda JM, Légaré D, Raymond F, Ouameur AA, Boisvert S, Rigault P, Corbeil J, Tremblay MJ,  
719 Olivier M, Papadopoulou B, Ouellette M. 2008. Modulation of gene expression in drug resistant  
720 Leishmania is associated with gene amplification, gene deletion and chromosome aneuploidy.  
721 *Genome Biol* **9**. doi:10.1186/gb-2008-9-7-r115

722 Van den Broeck F, Savill NJ, Imamura H, Sanders M, Maes I, Cooper S, Mateus D, Jara M, Adauí  
723 V, Arevalo J, Llanos-Cuentas A, Garcia L, Cupolillo E, Miles M, Berriman M, Schnauffer A, Cotton  
724 JA, Dujardin JC. 2020. Ecological divergence and hybridization of Neotropical Leishmania  
725 parasites. *Proc Natl Acad Sci U S A* **117**:25159–25168. doi:10.1073/pnas.1920136117

726 WHO. 2020. Ending the neglect to attain the sustainable development goals: a road map for  
727 neglected tropical diseases 2021–2030: overview. World Health Organization.

728

729

730 Supplementary text to

731 **High throughput single cell genome sequencing gives insights in the generation and evolution of mosaic**

732 **aneuploidy in *Leishmania donovani***

733 by

734 Gabriel H. Negreira<sup>1</sup>, Pieter Monsieurs<sup>1</sup>, Hideo Imamura<sup>1</sup>, Ilse Maes<sup>1</sup>, Nada Kuk<sup>2</sup>, Akila Yagoubat<sup>2</sup>, Frederik

735 Van den Broeck<sup>1</sup>, Yvon Sterkers<sup>2</sup>, Jean-Claude Dujardin<sup>1,3</sup>, Malgorzata A. Domagalska<sup>1</sup>

736

737 **Table of Contents**

738 ***Definitions and Glossary* ..... 33**

739 ***Supplementary methods* ..... 34**

740 **Single-cell DNA sequence data analysis ..... 34**

741 **Doublet detection ..... 37**

742 ***Supplementary results & discussion* ..... 38**

743 **Sequencing statistics ..... 38**

744 ***Supplementary References* ..... 40**

745 ***Supplementary Figures* ..... 41**

746

747

748



## 749 Definitions and Glossary

750 In the present paper, we use the following definitions for population, strains and clones;  
751 adapted from the nomenclature of salivarian trypanosomes (Baker et al., 1978). Accordingly:

752 - A population is a group of *Leishmania* cells present at a given time in a given culture or  
753 host;

754 - A strain is a population derived by serial passage in vitro from a primary isolate (in our  
755 case, from patient samples) without any implication of homogeneity but with some degree of  
756 characterization (in our case bulk genome sequencing).

757 - A clone is derived from a strain and is a population of cells derived from a single  
758 individual presumably by binary fission.

759 Other terms are defined in the following glossary:

| Term                                 | Definition                                                                                                                                                                                      |
|--------------------------------------|-------------------------------------------------------------------------------------------------------------------------------------------------------------------------------------------------|
| Bulk Genome Sequencing (BGS)         | Whole genome sequencing performed in a group of cells combined as a single sample.                                                                                                              |
| Single Cell Genome Sequencing (SCGS) | Genome sequencing performed in single cells individually.                                                                                                                                       |
| Somy                                 | The number of copies of a given chromosome in a cell.                                                                                                                                           |
| Polysomy                             | A somy higher than 2.                                                                                                                                                                           |
| Karyotype                            | The set of copy numbers of all chromosomes in a cell.                                                                                                                                           |
| Cell Karyotype                       | The karyotype of a cell determined by SCGS.                                                                                                                                                     |
| Populational Karyotype (Kp)          | The average karyotype of a population determined by BGS.                                                                                                                                        |
| Ploidy                               | The most frequent somy in a karyotype.                                                                                                                                                          |
| Euploidy                             | A condition where all chromosomes display the same somy in a cell.                                                                                                                              |
| Aneuploidy                           | A condition where one or more chromosomes display a somy that diverges from the other chromosomes in the same cell.                                                                             |
| Mosaic Aneuploidy                    | A condition where different aneuploid karyotypes co-exist in the same population.                                                                                                               |
| Cell scale factor (Sc)               | The lowest number between 1.8 and 5 by which when the average normalized read depths of all chromosomes in a cell are multiplied the resulting numbers are the closest to integers as possible. |
| Raw somy                             | The average normalized read depth of a chromosome multiplied by Sc.                                                                                                                             |
| Integer somy                         | The integer value assigned to a raw somy.                                                                                                                                                       |

## 760 **Supplementary methods**

### 761 **Single-cell DNA sequence data analysis**

762 Illumina Base call files (BCL) were demultiplexed and converted to FASTQ files using the  
763 cellranger-dna mkfastq command of the CellRanger™ DNA pipeline (10X Genomics). The FASTQ  
764 files were then used as inputs to the cellranger-dna cnv command in order to associate reads  
765 to individual cells based on their 10X barcodes and to map reads to a customized version of the  
766 LdBPKv2 *L. donovani* reference genome (available at  
767 <ftp://ftp.sanger.ac.uk/pub/project/pathogens/Leishmania/donovani/LdBPKPAC2016beta/>),  
768 where 'N's were added to the ends of chromosomes 1 to 5 to reach the 500kb minimum size  
769 allowed by the CellRanger DNA pipeline. The pipeline divides the genome into adjacent 20kb  
770 bins and outputs a CSV file containing the number of reads mapped to each bin. This file was  
771 used to estimate chromosomes copy number in a custom script written in R.

772 An overview of the steps performed by the script is shown in supp. fig. 3A. The script first  
773 removes bins with a low number of mapped reads by eliminating any bin showing an average  
774 depth of 0.5 read/cell. Then, the difference between the median number of reads of each bin  
775 and the chromosomal median is calculated. Bins with outlier values are determined using the  
776 boxplot.stats function from the R package grDevices v3.6.2. These outlier bins are removed  
777 from downstream analysis (supp. fig. 3B). This also excludes common local-CNVs found in some  
778 *L. donovani* strains, as for instance the H-Locus and the M-Locus in Chr23 and Chr36 respectively  
779 (Downing et al., 2011), present in the BPK strains/clones but absent in the HU3 strain. After  
780 removal of outlier bins, the bins depths are normalized by the cell mean and are used to  
781 estimate intrachromosomal variation (ICV). ICV is determined for each cell by dividing each  
782 chromosome in 3 segments and calculating the ratio between the segment with the highest and  
783 the segment with lowest depth. The mean of the five highest ICV values (i.e. the 5 most variable  
784 chromosomes in a cell) is assigned as its ICV-score. The distribution of ICV-scores in each sample  
785 was graphically analyzed in order to determine a threshold for exclusion of noisy cells. This  
786 threshold was defined as 2.0 for BPK282 cl4 and 1.7 for the BPK081 cl8 and the 'super-mosaic'  
787 samples.

788 The copy number of chromosomes in a cell is defined based on their normalized mean depth  
789 (NMD), i.e., the mean of the normalized depth values of the 20kb bins of a chromosome. In this  
790 sense, NMDs reflects the relative differences in copy number between chromosomes, but

791 absolute copy numbers must be inferred based on the ratios between NMDs of different  
792 chromosomes in a cell. Thus, considering that chromosomes copy numbers must be integers,  
793 the script uses an approach to determine absolute copy numbers which consists of multiplying  
794 NMDs by a scale factor which minimizes distances between the multiplied NMDs and integers.  
795 Therefore, the scale factor is defined as the lowest value between 1.8 and 5 which results to  
796 the closest approximation of NMDs to integers when they are multiplied by this factor. As the  
797 scale factor is directly affected by the ploidy of the cell, the limitation of the scale factor to  
798 values higher than 1.8 heuristically assumes that the lowest baseline ploidy of a cell is  $2n$ . This  
799 was done to prevent that  $2n$  cells with no odd somy value would be scaled as  $1n$  cells.

800 In order to determine the scale factor, the script multiply the NMDs of a cell by 1000  
801 equidistant numbers between 1.8 and 5. For each multiplication, the difference between the  
802 resultant values and their closest integers is calculated for each chromosome and averaged.  
803 The value that results in the lowest average distance to integers is then assigned to the cell as  
804 its scale factor (supp. fig. 3C). In case two or more scale factors result in the same average  
805 distance to integers, the one with the lowest value is chosen.

806 Since *Leishmania* chromosomes are biased in GC content (Imamura et al., 2020), with small  
807 chromosomes (Chr1 to Chr5) displaying a higher GC content than others, amplification bias due  
808 to differences in GC content can have a negative impact in the determination of the copy  
809 number of these chromosomes. Plotting the distribution of NMD values leads to different  
810 peaks, each peak representing one of the somy values, however, the peaks of these small  
811 chromosomes with high GC content are shifted relative to the other chromosomes (supp. fig.  
812 3D upper panel). Thus, to compensate for chromosome-specific amplification and to further  
813 define the somies of the cells, the above explained scale factor are used at two levels, i.e., at  
814 population level (all cells combined) as well as at single cell level (defined for each cell). In this  
815 sense, the script first defines a single scale factor to the whole population ( $S_p$ ) by which NMDs  
816 are multiplied and the distribution peak of the scaled NMDs of each chromosome is adjusted  
817 to the closest integer (supp. fig. 3D bottom panel). Then, these values are divided back by  $S_p$   
818 and based on this output a second scale factor is defined for each cell ( $S_c$ ). Thus, the NMDs of  
819 the chromosomes in a cell after bias compensation multiplied by the cell's  $S_c$  defines the 'raw  
820 somies' of the chromosomes of that cell.

821 Despite the fact that the abovementioned steps have moved the NMDs distribution closer  
822 to integer values, those values are still floating-point numbers. To determine the cells  
823 karyotypes, the raw floating-point somies are converted to integer copy numbers using  
824 Gaussian Mixture Models (GMMs). To generate a GMM for each chromosome, a vector  
825 containing all raw somy values determined for that chromosome among the filtered cells in a  
826 sample is used as input to the normalMixEM function of the mixtools R (Benaglia et al., 2009),  
827 following the defined rules bellow:

828 1) The possible integer values are defined as the number of different integers found when  
829 all values in the vector are rounded to the closest integer.

830 2) The number of components ( $k$ ) is determined as the total number of possible integer  
831 values.

832 3) The ratio between means ( $\mu$ ) of  $k$  gaussians are constrained to the ratios between the  
833 possible integer values.

834 4) If for a given gaussian, less than 5% of the values are inside the interval between  $\mu - 0.2$   
835  $< \mu < \mu + 0.2$ , the standard deviation ( $\sigma$ ) of that gaussian is arbitrarily limited to 0.1.

836 5) At least 5 iterations must be performed before a gaussian is defined.

837 Thus, for each chromosome in a sample, a gaussian is built for each possible integer somy  
838 (supp. fig. 3E). Raw somies are then converted to the rounded  $\mu$  of the gaussian of which they  
839 have the higher probability of belonging to. Since the GMMs must be built between cells sharing  
840 the sample baseline ploidy, and as the vast majority of cells in all samples sequenced in the  
841 present study had a scale factor lower than 2.5 and consequently were considered  $2n$  cells  
842 (supp. fig. 3F), the GMMs were applied only to  $2n$  cells. Moreover, since the number of non- $2n$   
843 cells were always very low, GMMs could not be built separately for cells with other baseline  
844 ploidies. Thus, cells which baseline ploidy was different than 2 were treated differently. In this  
845 case, cells with intermediate somies, i.e, with at least one raw somy values that are at a distance  
846 greater than 0.4 from its closest integers, were considered unresolvable and were removed  
847 from downstream analysis. The reminiscent had their raw somy values simply rounded to the  
848 closest integer. Karyotypes were then defined as the concatenated set of integer somy values  
849 found in a cell.

## 850 **Doublet detection**

851 Two different methods were used for doublet detection, i.e. an in-house developed  
852 methodology and Demuxlet (Kang et al., 2018), both exploiting the difference in SNP profile  
853 between HU3 cells versus other cell lines.

854 The in-house developed approach uses the following methodology: 1) Homozygote SNPs for  
855 the HU3 strain are predicted based on the genome of the HU3 strain sequenced by BGS (data  
856 not shown). 2) For each of those HU3 homozygote SNPs, the occurrence of this SNP is derived  
857 for each of the single cells in the 4-strains mixture sample (further called 'super-mosaic'). Given  
858 the low sequencing depth per cell (on average around 1x), this will report the absence or  
859 presence for each SNP. 3) For the HU3 cells in the super-mosaic, the majority of SNPs should be  
860 detected, while for the other three strains no SNPs should be detected. In case of a doublet  
861 consisting of a HU3 cell with a cell from one of the other three strains, two different scenarios  
862 can occur: If the sequencing depth is low, only the allele of one of the two cells can be predicted,  
863 while in case of a sufficient sequencing depth (at least 2x), both alleles (either the HU3 or the  
864 reference allele) can be detected, resulting in an allele frequency of 50%. In both cases, overall  
865 detection rate of the homozygote SNPs should be around 50%. In order to compensate for  
866 sequencing errors and differences in sequencing depth, libraries detecting between 10% and  
867 90% of the HU3 homozygote SNP list were classified as doublets. Homozygote SNPs were  
868 predicted based on the genome of the HU3 strain. Genetic variants were detected using the  
869 mpileup and call command of BCFtools (version 1.10.2). The view and query command of  
870 BCFtools were used to filter out genetic variants fulfilling the following conditions 1) minimum  
871 sequencing depth of 100, 2) only SNPs i.e., removing indels, 3) biallelic, 4) homozygous. In a  
872 second step, for each single cell those SNP positions are checked using the bcf tools mpileup  
873 command.

874 Demuxlet was run using the default parameters with the following input: 1) the bam file  
875 returned by the Cell Ranger software, produced for the single-cell experiment with the super-  
876 mosaic, 2) a vcf file describing the two different SNP profiles, i.e., the SNP profile for HU3, and  
877 the SNP profile for the three other strains.

## 878 **Supplementary results & discussion**

### 879 **Sequencing statistics**

880 Summary of sequencing statistics is provided in table S1. The BPK282 c14 and BPK081 c18  
881 were sequenced with the same targeted depth (75.000 reads per cell) but BPK282 c14 sample  
882 displayed a depth which was lower than anticipated (29.192 reads per cell). This was due to a  
883 high fraction (53.3%) of reads without a cell barcode in this sample, which according to the  
884 manufacturer indicates free floating DNA or a problem during library prep, but which unlikely  
885 affect copy number estimation. The scCNV library of the super-mosaic sample was sequenced  
886 deeper (209.000 reads per cell) to better allow the distinction between doublets. Higher  
887 coverage depths per cell were also associated with lower intra-chromosomal variation and  
888 lower frequency of intermediate somy values (supp. fig. 4A-B). This explains why sample  
889 BPK282 c14 displayed a higher overall ICV score compared to the other samples.

890 The noisy nature of whole genome amplification ultimately leads, in some cases, to the  
891 existence of raw somy values are at similar distances from two integers. Although the  
892 conversion of raw somies into integers could be achieved by simply rounding the raw somy  
893 values to the closest integers, this could overestimate the number of karyotypes identified in a  
894 population, as the wrong determination of a somy value of a single chromosome in a single cell  
895 is sufficient to lead to a new artificial karyotype. Thus, in order to convert the raw somy values  
896 into integers, we used a more stringent approach by constructing GMMs based on the  
897 distribution of raw somy values of each chromosome among cells in a given sample. One of the  
898 consequences of using this approach is that the frequency of which an integer somy value is  
899 present in a population influences the probability of a raw somy value to be assigned to this  
900 integer. This favors that intermediate somy values are assigned to the most frequent integer  
901 somy values in the population, reducing the chances of misinterpreting an intermediate value  
902 as a new, rare integer, and consequently greatly reducing the number of artificial karyotypes  
903 caused by the misinterpretation of a somy. This is evident, for example, when comparing the  
904 number of karyotypes identified in the BPK282 c14 sample using the GMMs (207 karyotypes)  
905 and when raw somies are just rounded to their closest integers (525 karyotypes - supp. fig. 4D).

906 Noisy data had also an impact on the scaling of the NMDs of cells into raw somies, as  
907 differences between chromosomes NMDs becomes less discrete. In the 3 samples submitted to  
908 SCGS here we noticed a higher ICV-score in a large fraction of cells which were scaled to baseline

909 ploidies different than 2 (supp. fig. 4C). These cells were removed from karyotype estimation  
910 either due to their ICR-score being above the threshold, or due to the presence of unresolvable  
911 intermediate somy values as described in the supplementary materials and methods.

912

913 **Supplementary References**

914 Baker JR, Brown KN, Godfrey DG. 1978. Proposals for the nomenclature of salivarian  
915 trypanosomes and for the maintenance of reference collections. *Bull World Health Organ*  
916 **56**:467–480.

917 Benaglia T, Chauveau D, Hunter DR, Young DS. 2009. Mixtools: An R package for analyzing finite  
918 mixture models. *J Stat Softw* **32**:1–29. doi:10.18637/jss.v032.i06

919 Downing T, Imamura H, Decuyper S, Clark TG, Coombs GH, Cotton JA, Hilley JD, De Doncker S,  
920 Maes I, Mottram JC, Quail MA, Rijal S, Sanders M, Schönian G, Stark O, Sundar S, Vanaerschot  
921 M, Hertz-Fowler C, Dujardin J-C, Berriman M. 2011. Whole genome sequencing of multiple  
922 *Leishmania donovani* clinical isolates provides insights into population structure and  
923 mechanisms of drug resistance. *Genome Res* **21**:2143–2156. doi:10.1101/gr.123430.111

924 Imamura H, Monsieurs P, Jara M, Sanders M, Maes I, Vanaerschot M, Berriman M, Cotton JA,  
925 Dujardin JC, Domagalska MA. 2020. Evaluation of whole genome amplification and  
926 bioinformatic methods for the characterization of *Leishmania* genomes at a single cell level. *Sci*  
927 *Rep* **10**:1–13. doi:10.1038/s41598-020-71882-2

928 Kang HM, Subramaniam M, Targ S, Nguyen M, Maliskova L, McCarthy E, Wan E, Wong S, Byrnes  
929 L, Lanata CM, Gate RE, Mostafavi S, Marson A, Zaitlen N, Criswell LA, Ye CJ. 2018. Multiplexed  
930 droplet single-cell RNA-sequencing using natural genetic variation. *Nat Biotechnol* **36**:89–94.  
931 doi:10.1038/nbt.4042

932

933



934 **Supplementary Figures**

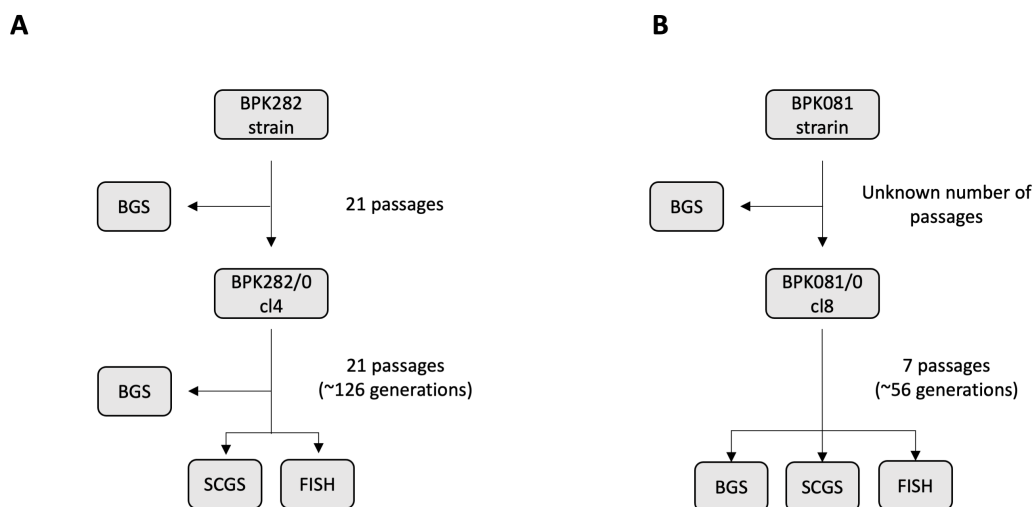

**Supplementary figure 1 – Flow chart of the two clonal populations used in the present study.** For BPK282 cl4, SCGS and FISH were performed in cultures at the same passage number. BGS was performed previously at passage 13 after cloning. For BPK081 cl8, all experiments were performed with the same culture. Number of generations is roughly estimated as  $26 + ((p-1) * 5)$ , where p is the number of passages. This is done assuming that it takes about 26 generations to reach a total of  $\sim 7 \times 10^7$  cells starting from 1 cell, an approximation to the total number of cells usually found in a culture flask with 5mL of culture medium at the moment the first passage is done, and also assuming that each subsequent passage represents  $\sim 5$  generations.

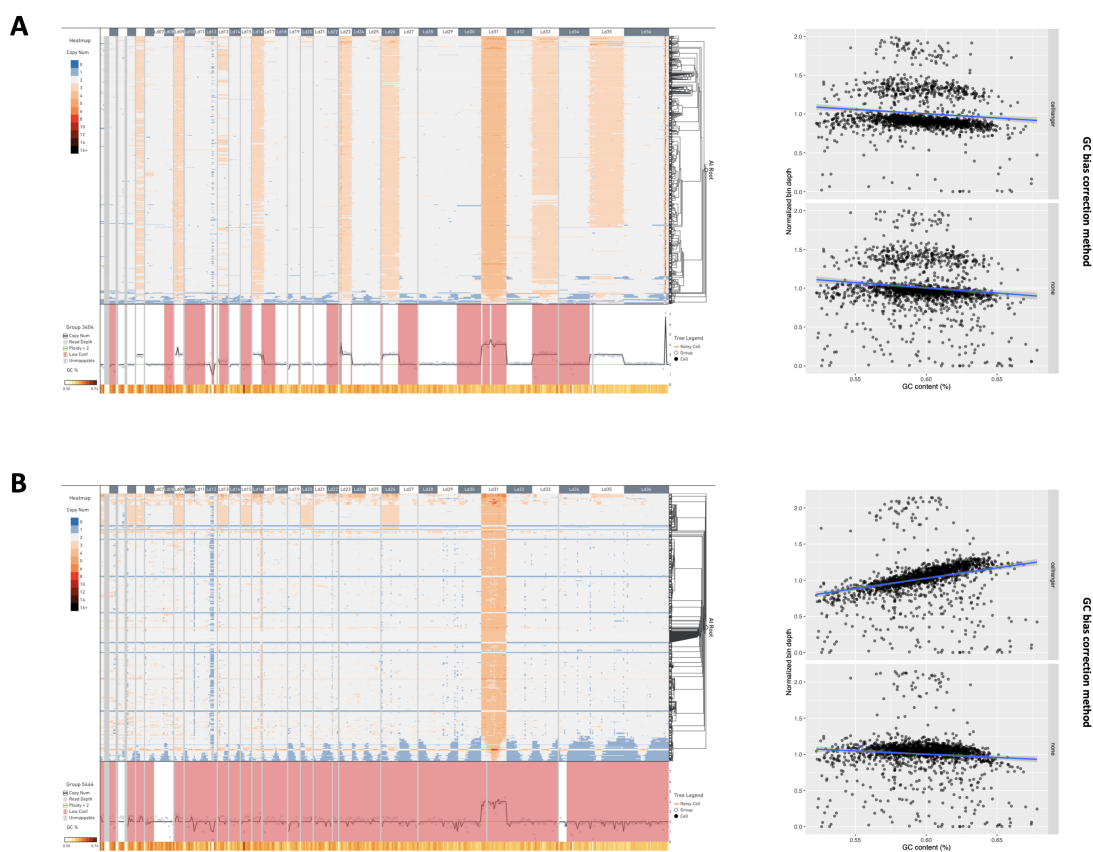

935

936

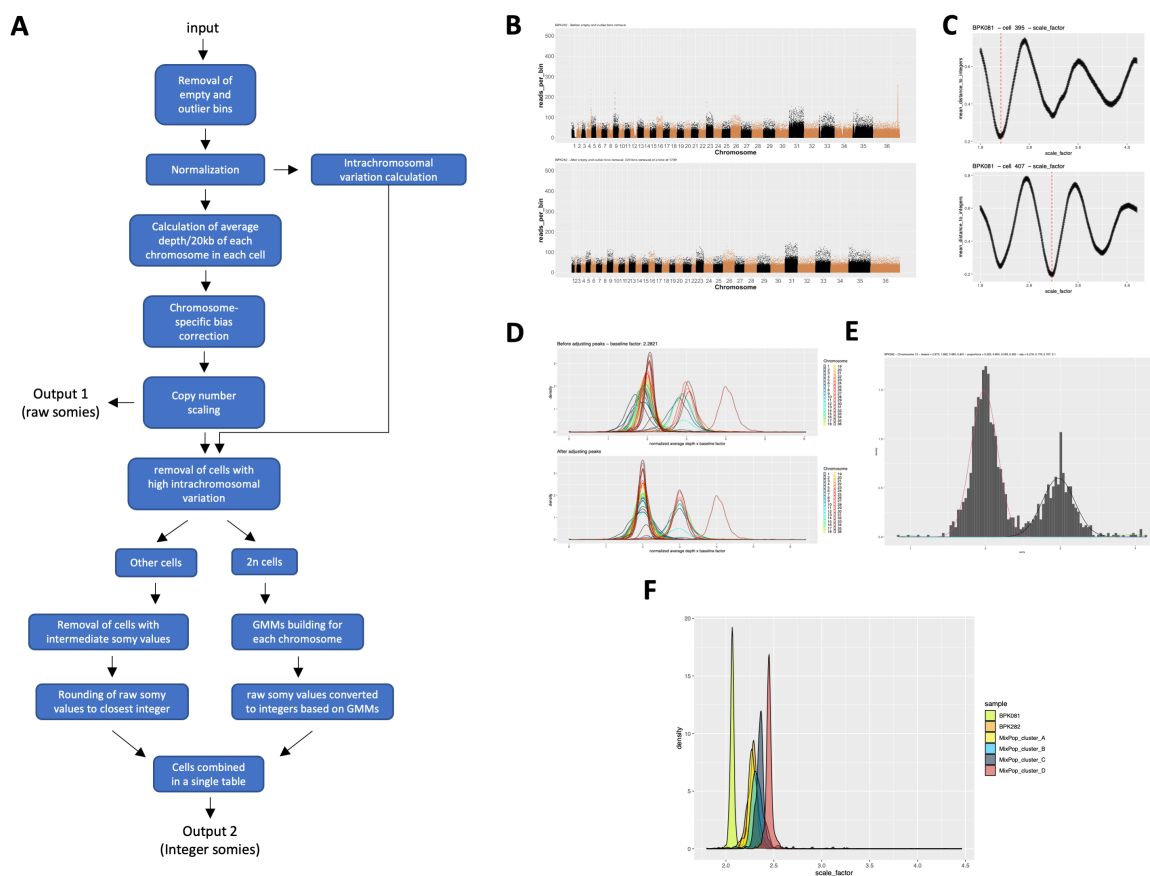

**Supplementary figure 3** - Bioinformatics pipeline for somy estimation. **A**. Flow chart of the script developed to estimate chromosomes copy numbers based on their average depth/20kb bin. The input file is a matrix containing the read count of each 20kb bin for each cell. Two output files are generated, one with the raw somy values (floating points) and another with integer somy values. **B**. An example of the effect of the removal of empty and outlier bins in the BPK282 c14 data. In this step, small intrachromosomal CNVs are also removed. **C**. Example of the determination of the scale factor for a 2N cell in the BPK081/0 c18 sample with karyotype 2 (top panel) and a 3N cell with karyotype 13 (bottom panel). Y-axis represents the mean distance to integers when the NMDs of that cell are multiplied by a given scale\_factor (x-axis). Red dashed line denotes the scale factor value defined for that cell. **D**. An example of the chromosome-bias correction step in the BPK282 c14 data. **E**. Example of a Gaussian Mixture Model (GMM) built for chromosome 13 in the BPK282 c14 data. The histogram represents the distribution of raw somy values for this chromosome in this sample, while the gaussian curves represent the GMM built for it. In this step, a gaussian is built for each integer, and raw somy values are assigned to the integer corresponding to the gaussian to which they have the higher probability. **F**. Distribution of the scale factors between all cells sequenced in this study.

937

938

939

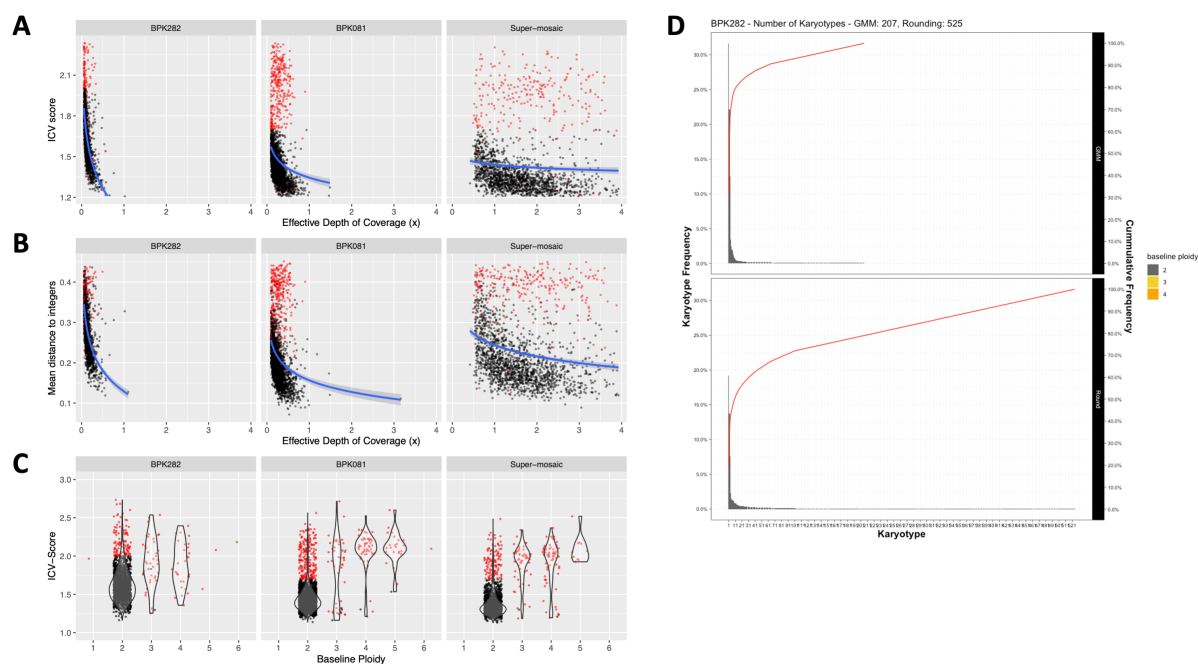

**Supplementary figure 4** – The relationship between the depth of coverage per cell and the cells ICV-score (**A**), mean distance to integers (**B**) and the relationship between the baseline ploidy defined for a cell – which is a direct consequence of the cells scale factor – and the cells ICV-score (**C**). Red dots represent cells which were removed from karyotype estimation. **D**. Comparison of the number and distribution of karyotypes identified in BPK282 when using the GMMs (top) and when raw somies are simply rounded to their closest integers (bottom).

940

941

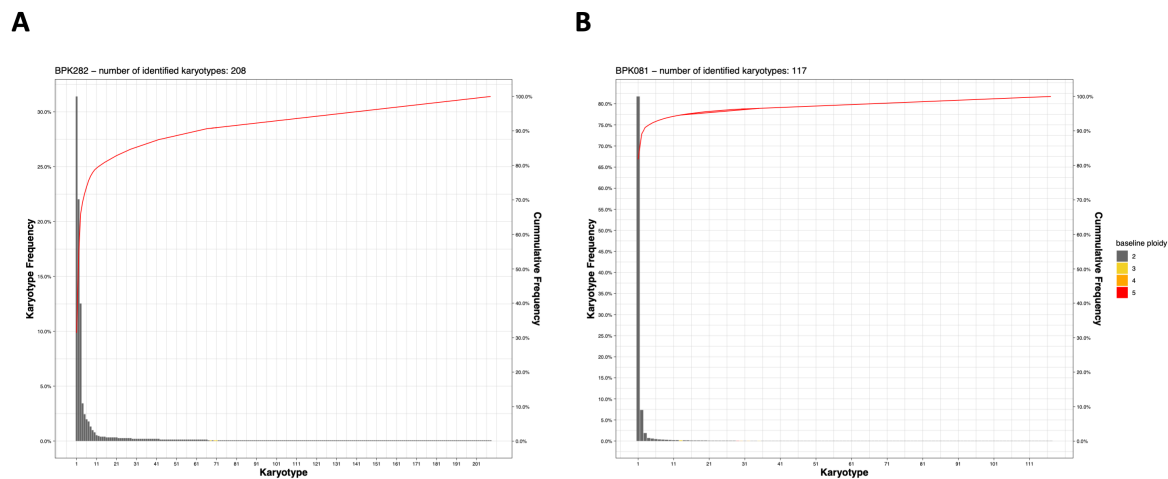

**Supplementary figure 5** - Frequency distribution of the karyotypes identified in **A**. BPK282 cl4 and **B**. BPK081 cl8 clones.

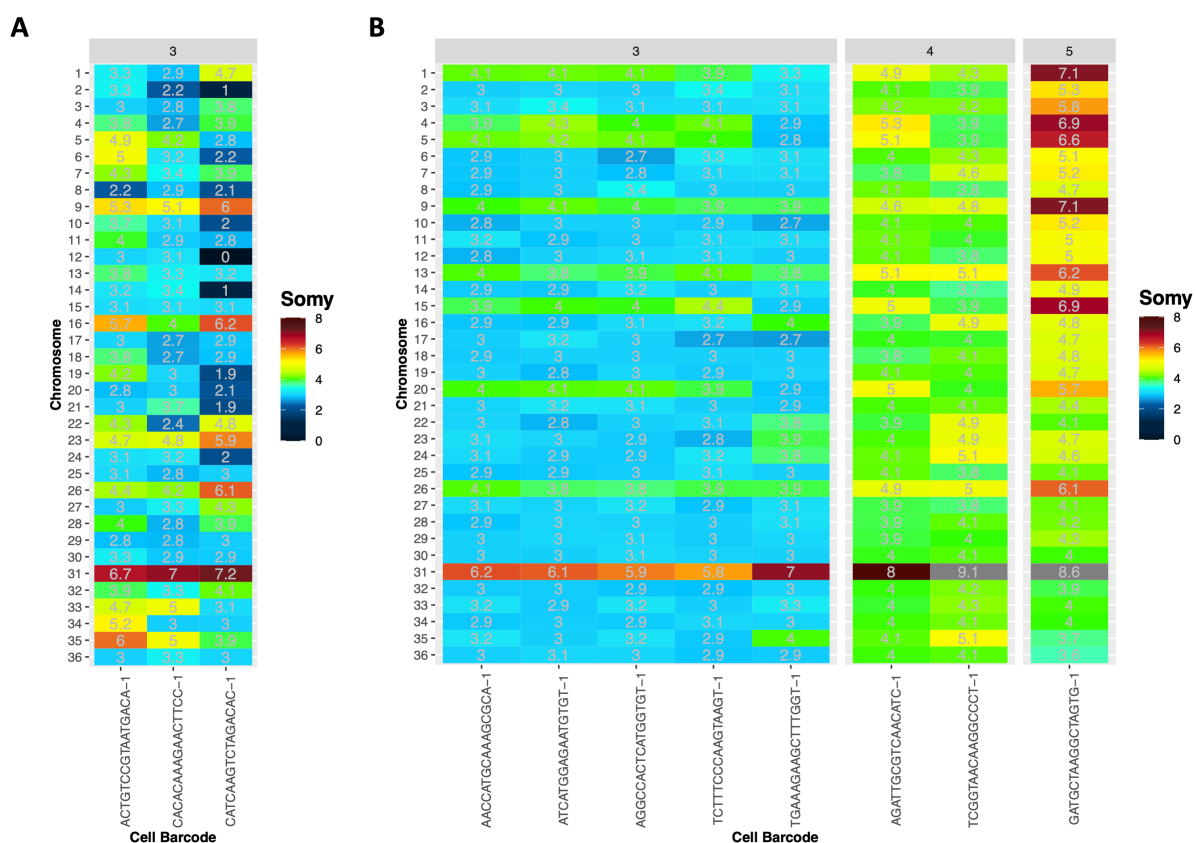

**Supplementary figure 6** - Raw somy values of potentially polyploid cells in BPK282 cl4 (A) and BPK081 cl8 (B) clones. Plots are separated by the baseline ploidy of the cells (indicated in the top).

942

943

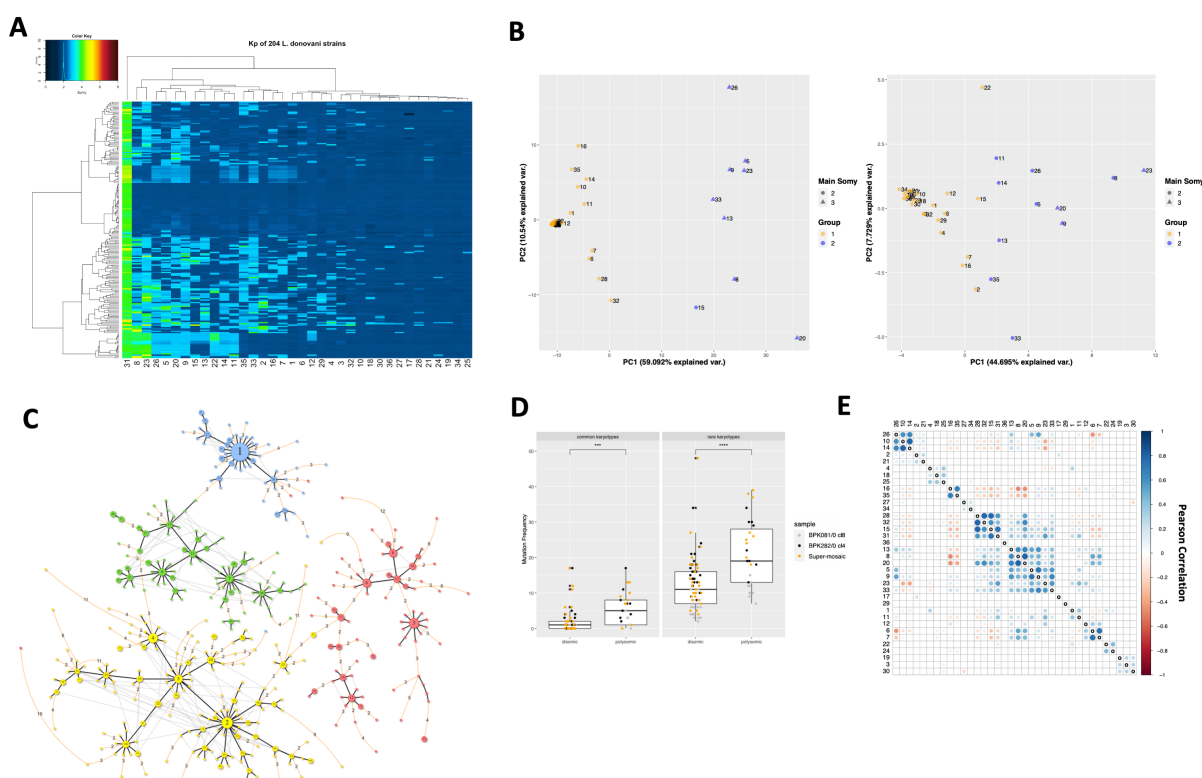

**Supplementary figure 7** – Supporting images for Fig 3 in the main text. **A**. Somies observed in the BGS data of 204 *L. donovani* strains (rows) with chromosomes (columns) hierarchically clustered. Data from Imamura H. et al, 2016. **B**. Principal Component Analysis constructed based on the somy values of each chromosome (dots) found in the 1554 cells from 6 different strains/clones (left panel) or among the Kp's of 204 *L. donovani* strains (right panel). **C**. Karyotype Network of the 'super-mosaic' population. Color of the nodes indicate the cluster to which each karyotype belongs. Yellow: Cluster A; Red: Cluster B; Green: Cluster C; Blue: Cluster D. **D**. Comparison of the frequency of somy change events between the polysomy-prone chromosomes and the chromosomes which are usually found as disomic. \*\*\* = p.value <0.001 and \*\*\*\* = p.value <0.0001 (T-test). **E**. Pearson correlation matrix used to generate the chord diagram in figure 3C in the main text. Correlations with p-value higher than 0.05 are not shown.

944

945

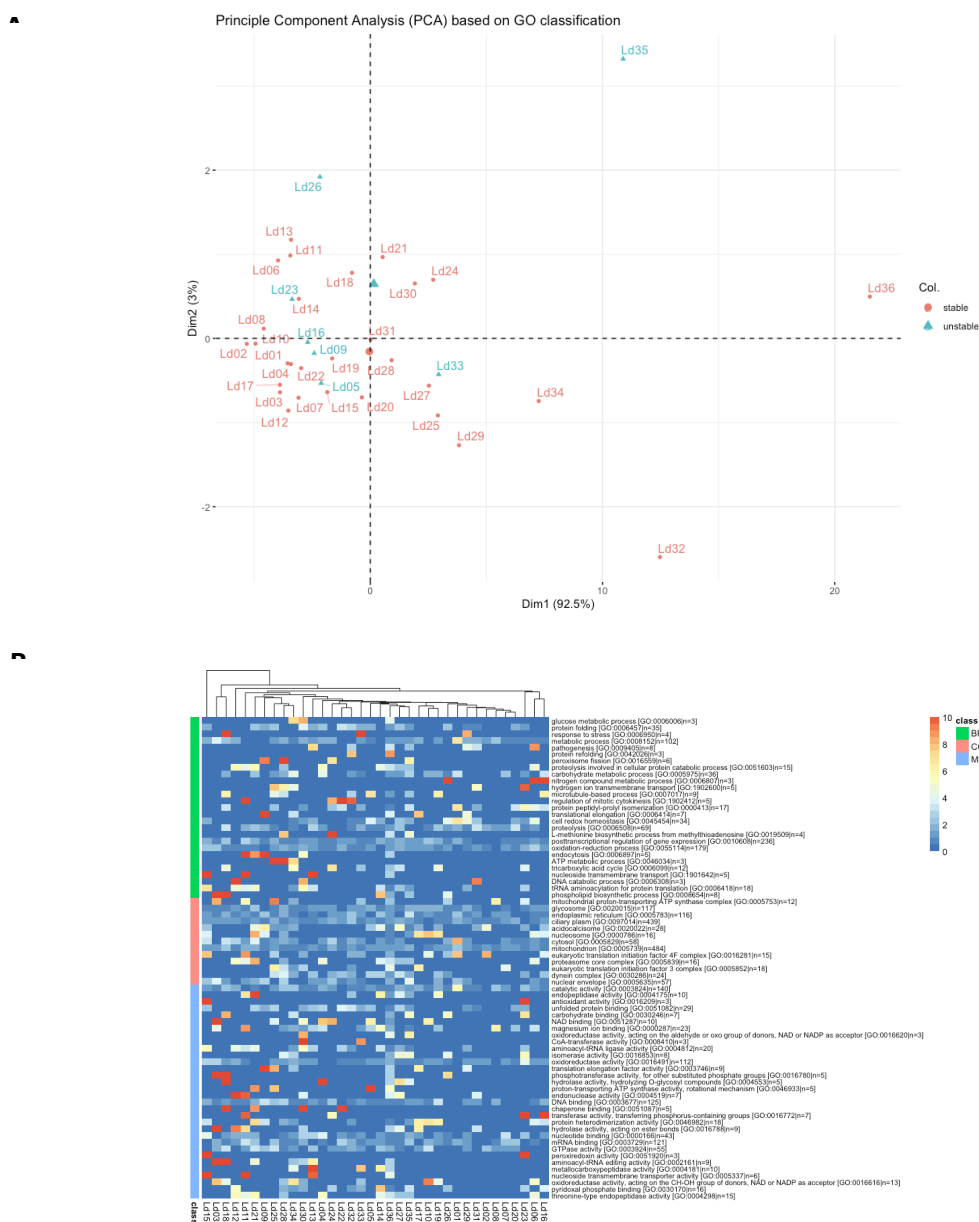

**Supplementary figure 8 – A.** Principal component analysis (PCA) based on the Gene Ontology (GO) annotation. Based on the GO annotation provided by TriTrypDB, the percentage of each GO category (minimal category size set to 10, maximum category size set to 500), the chromosome by GO category percentage matrix is used as input for the PCA analysis. Chromosomes indicated as “stable” due to their stable disomy are indicated in red, chromosomes which showed frequent changes in ploidy level are indicated in cyan. No obvious clustering of unstable chromosomes is observed based on their GO classification **B.** Heatmap showing the ratio of the genes assigned to a GO class over the total number of genes per GO class (colour code between 0% and 10%), calculated per chromosome. The list of GO classes shown in this heatmap are significantly enriched promastigote-specific GO classes, derived based on the transcriptomics data as available in Dumetz et al. 2017, and are grouped over the three main categories i.e. Biological Process (BP), Cellular Compartment (CC) and Molecular Function (MF). No clear clustering of polysomy-prone chromosomes based on the GO classification was observed.

946

947
